1 **Robust and stable transcriptional repression in *Giardia* using CRISPRi**

2 \*McInally SG, \*Hagen KD, Nosala C, Williams J, Nguyen K, Booker J, Jones K, and Scott C.

3 Dawson

4

5 \*These authors contributed equally to this work

6

7 Department of Microbiology and Molecular Genetics

8 One Shields Avenue

9 UC Davis

10 Davis, CA 95616

11

12 Corresponding author: [scdawson@ucdavis.edu](mailto:scdawson@ucdavis.edu)

13

14 **Running Title: CRISPRi in *Giardia***

15 **Keywords:** *Giardia*, CRISPR/Cas9, CRISPRi, kinesin

1 **ABSTRACT**

2 *Giardia lamblia* is a binucleate protistan parasite causing significant diarrheal disease  
3 worldwide. An inability to target Cas9 to both nuclei, combined with the lack of non-  
4 homologous end joining and markers for positive selection, has stalled the adaptation of  
5 CRISPR/Cas9-mediated genetic tools for this widespread parasite. CRISPR interference (CRISPRi)  
6 is a modification of the CRISPR/Cas9 system that directs catalytically inactive Cas9 (dCas9) to  
7 target loci for stable transcriptional repression. Using a *Giardia* nuclear localization signal to  
8 target dCas9 to both nuclei, we developed efficient and stable CRISPRi-mediated transcriptional  
9 repression of exogenous and endogenous genes in *Giardia*. Specifically, CRISPRi knockdown of  
10 kinesin-2a and kinesin-13 causes severe flagellar length defects that mirror defects with  
11 morpholino knockdown. Knockdown of the ventral disc MBP protein also causes severe  
12 structural defects that are highly prevalent and persist in the population more than five days  
13 longer than transient morpholino-based knockdown. By expressing two gRNAs in tandem to  
14 simultaneously knock down kinesin-13 and MBP, we created a stable dual knockdown strain  
15 with both flagellar length and disc defects. The efficiency and simplicity of CRISPRi in polyploid  
16 *Giardia* allows for rapid evaluation of knockdown phenotypes and highlights the utility of  
17 CRISPRi for emerging model systems.

18

19

20

21

22

## 1 INTRODUCTION

2 *Giardia lamblia* is a common parasitic protist that infects over three hundred million people  
3 worldwide each year, causing acute diarrheal disease in areas with inadequate sanitation and  
4 water treatment (Einarsson et al., 2016). *Giardia* has a two-stage life cycle in which mammalian  
5 hosts ingest quadrinucleate cysts from contaminated water sources. As they pass into the  
6 gastrointestinal tract, cysts develop into binucleate, flagellated trophozoites. During infection,  
7 trophozoites attach extracellularly to the gut epithelium, proliferate, and later differentiate  
8 back into infectious cysts that are passed into the environment (Heyworth, 2014). Giardiasis is  
9 considered a neglected disease (Savioli et al., 2006), and the need for new effective and  
10 affordable treatments for giardiasis is underscored by estimated failure rates of up to 20% for  
11 standard treatments (Upcroft and Upcroft, 2001), emerging evidence of drug resistance (Barat  
12 and Bloland, 1997; Land and Johnson, 1999; Upcroft et al., 1996), and the prevalence of chronic  
13 or recurrent infections (Bartelt and Sartor, 2015).

14       The nuclei in trophozoites and cysts are diploid (Bernander et al., 2001),  
15 transcriptionally active (Kabnick and Peattie, 1990), and genetically equivalent (Adam et al.,  
16 2013; Franzen et al., 2009; Hanevik et al., 2015; Morrison et al., 2007). Because *Giardia*  
17 trophozoites are effectively tetraploid and lack a defined sexual cycle (Poxleitner et al., 2008),  
18 the development of molecular genetic tools in *Giardia* has generally lagged behind other  
19 parasitic protists. Although new CRISPR/Cas9 gene-editing strategies have revolutionized  
20 molecular genetics in other protists (Grzybek et al., 2018), the adaptation of CRISPR-based tools  
21 for *Giardia* has been hindered by *Giardia's* lack of a non-homologous end-joining (NHEJ)  
22 pathway (Morrison et al., 2007) and by the inability to target native *Streptomyces pyogenes*

1 Cas9 (SpCas9) to the two nuclei. The widely used SV40 nuclear localizing signal (NLS) failed to  
2 localize full-length Cas9 (Ebnetter et al., 2016), although it has been used previously in *Giardia* to  
3 localize exogenously expressed GFP or TetR protein to the nuclei (Elmendorf et al., 2000). For  
4 these reasons, the first *Giardia* quadruple knockout strain of the cyst wall component CWP1  
5 was constructed using Cre/loxP sequential gene disruption, rather than a CRISPR/Cas9-  
6 mediated strategy (Ebnetter et al., 2016).

7 Gene knockouts are only one of many strategies to interrogate gene function (Qi et al.,  
8 2013), and null alleles in essential processes like cell cycle regulation (Horlock-Roberts et al.,  
9 2017) and cytokinesis (Hardin et al., 2017) can result in severely reduced fitness or lethality.  
10 Translational repression using morpholino oligonucleotides has been used extensively in  
11 *Giardia* (House et al., 2011; Paredez et al., 2011; Woessner and Dawson, 2012), but  
12 morpholinos are transient (lasting less than 48 hours), lack complete penetrance, and are  
13 costly, making morpholino knockdowns less useful for genome-wide functional screens  
14 (Krtkova and Paredez, 2017). Both the transience and incomplete penetrance of morpholino  
15 knockdowns are problematic for evaluation of infection dynamics of *Giardia* mutants (Barash,  
16 2017). Transcriptional repression is an important alternative strategy for the characterization of  
17 gene function; however, despite the presence of conserved components of the RNAi  
18 machinery, RNAi does not efficiently silence genes in *Giardia* (Krtkova and Paredez, 2017).

19 CRISPR/Cas9 is a modular and flexible DNA-binding platform that has been adapted for  
20 applications beyond genome editing, including transcriptional repression (Larson et al., 2013).  
21 The CRISPR interference system (CRISPRi) is a modification of the CRISPR/Cas9 system, in which  
22 a catalytically inactive or “dead” Cas9 (dCas9) induces stable, inducible, or reversible gene

1 knockdown in eukaryotes (Larson et al., 2013; Piatek et al., 2015), as well as diverse bacteria  
2 (Kaczmarzyk et al., 2018; Larson et al., 2013; Liu et al., 2017; Tao et al., 2017; Zhang et al., 2016;  
3 Zuberi et al., 2017). Using a complementary guide RNA (gRNA), the inactive dCas9 is directed to  
4 precise genomic targets, where it binds and inhibits transcription initiation and/or elongation  
5 rather than inducing double-stranded breaks in DNA (Larson et al., 2013). CRISPRi has  
6 significant advantages over RNAi or morpholinos as it directly and stably inhibits transcription  
7 (Larson et al., 2013). In many systems, CRISPRi is empirically as effective as RNAi in  
8 transcriptional silencing, with significantly fewer off-target effects (Larson et al., 2013).

9       Here we demonstrate precise and stable CRISPRi-mediated transcriptional repression of  
10 both exogenous and endogenous genes in *Giardia*. This first successful application of CRISPRi  
11 for transcriptional knockdown in a parasitic protist—or a polyploid eukaryote— highlights the  
12 utility of CRISPRi for emerging model systems. Using a *Giardia* nuclear localization signal (NLS)  
13 to target dCas9 to both nuclei, we show efficient and persistent CRISPRi-mediated repression of  
14 one exogenous reporter gene and three endogenous *Giardia* cytoskeletal genes. CRISPRi  
15 knockdowns have severe cytoskeletal phenotypes that are highly prevalent and persist at least  
16 one week in cultured trophozoites. We also tandemly express gRNAs to simultaneously knock  
17 down one flagellar and one ventral disc gene, resulting in a stable strain with two knockdown  
18 phenotypes. The efficiency and simplicity of CRISPRi in *Giardia* permits the rapid assessment of  
19 the phenotypic consequences of protein knockdown (Jost et al., 2017; Larson et al., 2013) and  
20 will likely enable the first forward and reverse genetic screens.

## 21 **METHODS**

### 22 ***Construction of the expression vector Cas9-SV40NLS-GFP for Cas9 localization***

1 The expression vector Cas9-SV40NLS-GFP was constructed by placing mammalian codon-  
2 optimized *Streptococcus pyogenes* Cas9 (mCas9) with a C-terminal SV40 nuclear localizing signal  
3 (NLS) from JDS246 (Addgene #43861, JK Joung, unpublished) under the control of the *Giardia*  
4 malate dehydrogenase (MDH; GiardiaDB GL50803\_3331) promoter. A 3xHA epitope tag widely  
5 used in *Giardia* (Gourguechon and Cande, 2011) was added to the C-terminal end and the  
6 resulting P<sub>MDH</sub>-mCas9-SV40NLS-3HA fragment was cloned into our C-terminal GFP vector,  
7 pcGFP1Fpac (Hagen et al., 2011), fusing Cas9 to GFP.

#### 8 ***Identification of putative Giardia NLSs and construction of vectors to test NLS efficacy***

9 Putative NLS sequences were identified among the protein sequences of 65 *Giardia* strains  
10 expressing C-terminal GFP-tagged proteins that localize to the nuclei (Aurrecoechea et al.,  
11 2009) using the NLS prediction software NLStradamus (Nguyen Ba et al., 2009), with the two  
12 state HMM static model and posterior prediction with a cutoff of 0.6. To delete C-terminal  
13 NLSs, we amplified protein coding regions plus 200 bp of upstream sequence to include native  
14 promoters using reverse primers that excluded the NLSs and any downstream sequence. The  
15 truncated fragments were cloned into pcGFP1Fpac (Hagen et al., 2011). NLS sequences were  
16 added to Cas9 either by replacing the GFP tag in Cas9-SV40NLS-GFP with the NLS sequence to  
17 be tested (for C-terminal NLSs), or by adding a new start codon and NLS in front of the start  
18 codon of Cas9 (for N-terminal NLSs). NLS sequences were generated by PCR amplification from  
19 genomic DNA or by annealing short complementary oligonucleotides.

#### 20 ***Construction of dCas9 CRISPR interference vector dCas9g1pac***

21 dCas9g1pac was created by amplifying the GL50803\_2340 NLS from *Giardia* genomic DNA with  
22 2340NLSAgeF (5'-actgctaccggtctcccagagaagaagcgggtccaag-3') and 2340NLSNotIR (5'-

1 actgctgcgccgccttagctcttaattttactaactctacgatcc-3') and cloning it into Cas9-SV40NLS-GFP to  
2 replace GFP. A gRNA expression cassette with inverted BbsI sites for cloning specific gRNA  
3 targeting sequences was added, followed by the gRNA scaffold sequence from pX330 (Cong et  
4 al., 2013). To drive gRNA expression in *Giardia* and ensure proper termination, we included  
5 approximately 200 bp of DNA located upstream and downstream of the *Giardia* U6  
6 spliceosomal snRNA (Hudson et al., 2012). The upstream sequence includes 12 bp of U6 coding  
7 sequence, and the downstream sequence includes the 12 bp motif thought to mediate 3' end  
8 processing (Hudson et al., 2012). The gRNA cassette was synthesized (Biomatik) and inserted  
9 into a unique Acc65I site in the vector. The dCas9 mutations D10A and H840A were added by  
10 replacing a 3.6 kb NcoI-NheI fragment within Cas9 with a similar fragment from dCas9 vector  
11 MSP712 (Addgene #65768) (Kleinstiver et al., 2015). As constructed, the dCas9g1pac vector  
12 contains an 18 bp non-specific sequence between the U6 promoter and gRNA scaffold  
13 sequence that also includes the inverted BbsI sites for cloning annealed guide oligos. All BLAST  
14 hits for this sequence to the *Giardia* ATCC 50803 genome lack the protospacer adjacent motif  
15 (PAM) that is essential for CRISPRi silencing (Larson et al., 2013); all also have mismatches in the  
16 critical 'seed region' required for dCas9 binding (Qi et al., 2013) or have six or more mismatches  
17 throughout the guide sequence. Trophozoites carrying the 'non-specific gRNA' vector have no  
18 discernable phenotype.

### 19 **Guide RNA design and cloning**

20 Specific guide RNAs (20 nt) were designed with the CRISPR 'Design and Analyze Guides' tool  
21 from Benchling (<https://benchling.com/crispr>) using a NGG PAM sequence and the *Giardia*  
22 *lamblia* ATCC 50803 genome (GenBank Assembly GCA\_000002435.1). gRNAs were designed to

1 target the non-template strand unless otherwise specified (Supplemental Material). gRNA  
2 oligonucleotides with 4-base overhangs complementary to the vector sequence overhangs  
3 were annealed and cloned into BbsI-digested dCas9g1pac. To express two gRNAs, each was  
4 individually cloned and then a universal primer set (gRNA\_multiplex\_F: 5'-  
5 gtcttataaggtaccgagcttgattgcaatagcaaacag-3' and gRNA\_multiplex\_R: 5'-  
6 ctatagggcgaattcgagctgagctcggtaccttataagacaacatc-3') was used to amplify the entire gRNA  
7 cassette from one plasmid and insert it into the SacI site of the second via Gibson assembly  
8 (Gibson et al., 2009). This method was also used to generate the non-specific gRNA plasmid  
9 dCas9g2pac, which has two gRNA cassettes, each with the non-specific gRNA sequence used in  
10 dCas9g1pac. While we have only used two gRNAs here, this method regenerates the SacI  
11 restriction site, allowing the insertion of additional gRNAs using the same primers  
12 (Supplemental Material).

### 13 ***Construction of the NanoLucNeo luciferase expression vector***

14 The NanoLucNeo vector was constructed via PCR amplification of the MDH promoter  
15 (GiardiaDB GL50803\_3331), and NanoLuc (pFN31K, Promega). The resulting amplicons were  
16 cloned via Gibson assembly into BamHI and EcoRI digested pKS\_mNeonGreen-N11\_NEO  
17 (Hardin et al., 2017).

### 18 ***Strains and culture conditions***

19 All *G. lamblia* (ATCC 50803) strains were cultured in modified TYI-S-33 medium supplemented  
20 with bovine bile and 5% adult and 5% fetal bovine serum [56] in sterile 16 ml screw-capped  
21 disposable tubes (BD Falcon), and incubated upright at 37°C without shaking. Vectors were  
22 introduced into WBC6 or NanoLucNeo trophozoites by electroporation (~20 µg DNA) as



1 previously described (Hagen et al., 2011). Strains were maintained with antibiotic selection (50  
2  $\mu\text{g/ml}$  puromycin and/or 600  $\mu\text{g/ml}$  G418) (Hagen et al., 2011). All CRISPRi strains were thawed  
3 from frozen stocks and cultured for 24 to 48 hours prior to phenotypic analysis, unless  
4 otherwise specified.

#### 5 ***In vitro bioluminescence assays of NanoLuc knockdown strains***

6 *Giardia* trophozoites were grown to confluency at 37°C for 48 hours, iced for 15 minutes to  
7 detach trophozoites and centrifuged at 900 x g for five minutes at 4°C. Trophozoites were  
8 resuspended in 1 ml of cold media and serial dilutions ( $10^{-1}$ ,  $10^{-2}$ ) were made for enumeration  
9 using a hemocytometer. To measure luminescence, three 50  $\mu\text{l}$  aliquots of the  $10^{-2}$  dilution  
10 (approximately  $10^3$  cells) were loaded into a white opaque 96-well assay plate (Corning Costar)  
11 and incubated for 30 minutes at 37°C. Following incubation, 50  $\mu\text{l}$  of Nano-Glo® Luciferase  
12 assay reagent (Promega), prepared at a 1:50 ratio of substrate to buffer, was added to each  
13 well. Luminescence was analyzed on a VictorX3 plate reader warmed to 37°C, using 0.1-second  
14 exposures, repeated every 30 seconds until maximal signal was detected. Experiments were  
15 performed using two independent samples with three technical replicates that were averaged  
16 over three different luminescence acquisitions and displayed with 95% confidence intervals. To  
17 determine the linear dynamic range of detection for the NanoLucNeo strain, we used tenfold  
18 serial dilutions and plotted the luminescence readings versus the number of cells loaded into  
19 each well (Supplemental Material).

#### 20 ***Quantitation of transcriptional knockdown using quantitative PCR (qPCR)***

21 RNA was extracted using a commercial kit (Zymo Research). RNA quality was assessed by  
22 spectrophotometric analysis and electrophoresis prior to double-stranded cDNA synthesis using

1 the QuantiTect Reverse Transcription Kit (Qiagen). Quantitative PCR of kinesin-2a (GiardiaDB  
2 GL50803\_17333) was performed using 17333\_qPCR1F 5' GCCTCAACCAACTACGACGA 3' and  
3 17333\_qPCR1R 5' TCAGCACATCCATCGGCTTT 3'. Quantitative PCR of kinesin-13 (GiardiaDB  
4 GL50803\_16945) was performed with 16945\_qPCR3F 5' CCAATACGCTGCAAAGCCTC 3' and  
5 16945\_qPCR3R 5' AGCCAGTTTGTCCATACGCA 3'. Analyses were performed using SensiFast No-  
6 ROX SYBR-green master mix (Bioline) in an MJ Opticon thermal cycler, with an initial two-  
7 minute denaturation step at 95°C followed by 40 cycles of 95 °C for 5 seconds, 60°C for 10 s,  
8 and 72 °C for 10 s. The constitutively expressed gene for glyceraldehyde 3-phosphate  
9 dehydrogenase (GAPDH, GiardiaDB GL50803\_6687) was chosen as an internal reference gene  
10 and was amplified with gapdh-F 5' CCCTTCACGGACTGTGAGTA 3' and gapdh-R 5'  
11 ATCTCCTCGGGCTTCATAGA 3' (Barash, 2017). Ct values were determined using the Opticon  
12 Monitor software and statistical analyses were conducted using custom Python scripts. All qPCR  
13 experiments were performed using two biologically independent samples with four technical  
14 replicates. Data are shown as mean expression relative to the GAPDH control sample with 95%  
15 confidence intervals.

### 16 ***Immunostaining of Cas9 and dCas9 CRISPRi knockdown strains***

17 *Giardia* trophozoites were grown to confluency were harvested (see above), washed twice with  
18 6 ml of cold 1X HBS and resuspended in 500 µl of 1X HBS. Cells (250 µl) attached to warm  
19 coverslips (37°C, 20 min) were fixed in 4% paraformaldehyde, pH 7.4 (37°C, 15 min), washed  
20 three times with 2 ml PEM, pH 6.9 (Woessner and Dawson, 2012), incubated in 0.125M glycine  
21 (15 min, 25°C), washed three more times with PEM, and permeabilized with 0.1% Triton X-100  
22 for 10 minutes. After three additional PEM washes, coverslips were blocked in 2 ml PEMBALG

1 (Woessner and Dawson, 2012) for 30 minutes and incubated overnight at 4°C with anti-TAT1  
2 (1:250, Sigma), anti-HA (1:500, Sigma), anti-beta-giardin (1:1000, gift of M. Jenkins, USDA)  
3 and/or anti-Cas9 (1:1000, Abcam) antibodies. Coverslips were washed 3 times in PEMBALG and  
4 incubated with Alex Fluor 488 goat anti-rabbit and/or Alex Fluor 594 goat anti-mouse  
5 antibodies (1:250; Life Technologies) for two hours at room temperature. Coverslips were then  
6 washed three times each with PEMBALG and PEM and mounted in Prolong Gold antifade  
7 reagent with DAPI (Life Technologies). All imaging experiments were performed with three  
8 biologically independent samples.

### 9 ***Comparing mutant phenotype severity, prevalence, and persistence between CRISPRi and*** 10 ***morpholino knockdowns***

11 Morpholino knockdown of median body protein (MBP, GiardiaDB GL50803\_16343) was  
12 performed as previously described, using the same anti-MBP and mispair morpholino  
13 sequences (Woessner and Dawson, 2012). Following electroporation, morpholino knockdown  
14 cells were cultured for 24, 48, 72 and 168 hours. The CRISPRi MBP+11 and non-specific gRNA  
15 knockdown strains, generated as described above, were cultured from a frozen stock of fully-  
16 selected trophozoites passaged for 24, 48, 72 and 168 hours. At each time point, trophozoites  
17 were harvested, fixed and stained as described above. Three biologically independent samples  
18 were analyzed for each time point and knockdown method.

### 19 ***Flagellar pair length measurements and ventral disc phenotype analysis***

20 Serial sections of fixed trophozoites were acquired at 0.2 µm intervals using a Leica DMI 6000  
21 wide-field inverted fluorescence microscope with a PlanApo ×100, 1.40 numerical aperture (NA)  
22 oil-immersion objective. For flagellar pair length measurements, DIC images were analyzed in

1 FIJI (Schindelin et al., 2012) using a spline-fit line to trace the flagella from the cell body to the  
2 flagellar tip. Flagellar length data are presented as mean caudal flagellar length with 95%  
3 confidence intervals. For analysis of ventral disc phenotypes, the proportion of aberrant ventral  
4 discs and dCas9-positive nuclei within a field of view was determined from maximum intensity  
5 projections of processed images. Trophozoites with colocalized DAPI and anti-Cas9  
6 immunostaining were evaluated as positive for dCas9 expression, while cells with undetectable  
7 colocalization were scored as dCas9 negative. Colocalization and flagellar length measurements  
8 were analyzed, and figures were generated using custom Python scripts.

9 Super-resolution images of trophozoites exhibiting phenotypes typical of median body  
10 protein (MBP, GL50803\_16343) silencing by dCas9 were collected at 0.125  $\mu\text{m}$  intervals on a  
11 Nikon N-SIM Structured Illumination Super-resolution Microscope with a 100x, 1.49 NA  
12 objective, 100 EX V-R diffraction grating, and an Andor iXon3 DU-897E EMCCD. Images were  
13 reconstructed in the “Reconstruct Slice” mode and were only used if the reconstruction score  
14 was 8. Raw and reconstructed image quality were further assessed using SIMcheck (Ball et al.,  
15 2015); only images with adequate scores were used for analysis. Images are displayed as a  
16 maximum intensity projection.

17

## 18 **RESULTS**

### 19 ***The SV40 NLS is not sufficient to localize Cas9 to the two Giardia nuclei***

20 To express Cas9 in *Giardia*, we cloned mammalian-codon optimized *Streptococcus pyogenes*  
21 Cas9 (mCas9) with a C-terminal SV40 nuclear localization signal (NLS) and a 3XHA epitope tag  
22 into the pcGFP1Fpac backbone ( Hagen et al., 2011), creating a Cas9-SV40NLS-3XHA-GFP fusion

1 (Figure 1A). A comparison of the modal codon usage frequencies (Davis and Olsen, 2010) of  
2 mCas9 and all protein coding genes of *Giardia lamblia* ATCC 50803 indicated that further codon  
3 optimization of mCas9 was unnecessary. As Cas9 toxicity has been reported in some systems  
4 (Jiang et al., 2014), Cas9 was expressed using a moderate-strength *Giardia* promoter for the  
5 constitutive malate dehydrogenase (MDH, GL50803\_3331) gene (Figure 1A).

6 The Cas9-GFP fusion with a C-terminal SV40 NLS localized only to the cytoplasm, with no  
7 signal detected in either of the nuclei (Figure 1A). Cas9 localization to the nucleus is required  
8 for Cas9 genome editing, therefore we added a second SV40 NLS at the N-terminus. However,  
9 addition of another SV40 NLS had no impact on nuclear localization (Figure 1B). Thus, the SV40  
10 NLS, which is commonly used in other systems and for recombinant Cas9 in commercial  
11 Cas9/CRISPR kits, is not sufficient for nuclear localization of Cas9 in *Giardia*. The failure of the  
12 SV40 NLS to target full length Cas9 to *Giardia's* nuclei has been recently noted (Ebnetter et al.,  
13 2016), although a truncated and inactive Cas9 was successfully localized with this NLS (Ebnetter  
14 et al., 2016), as were GFP and TetR (Elmendorf et al., 2000).

### 15 ***Defining a native Giardia NLS to target Cas9 and dCas9 to both nuclei***

16 To localize Cas9 to *Giardia's* nuclei we used the NLS prediction software NLStradamus to screen  
17 for putative NLS sequences (Nguyen Ba et al., 2009). We identified 13 putative NLSs in 65  
18 proteins with known nuclear localization (Supplemental Material). To determine whether the  
19 putative NLSs were necessary for nuclear localization, we deleted C-terminal putative NLS  
20 sequences from seven nuclear-localizing GFP tagged *Giardia* proteins and assayed for loss of  
21 nuclear localization. Deletion of putative NLSs from three proteins resulted in the loss of  
22 nuclear localization or an increase in localization to the cytoplasm (Supplemental Material).

1 Deletion of the other four NLSs had no effect on nuclear localization. All three candidate NLSs  
2 were sufficient for Cas9 localization to the nuclei (Supplemental Material). Cas9 nuclear  
3 localization was the most intense and prevalent with the 34-amino acid C-terminal NLS from  
4 the *Giardia* protein GL50803\_2340 (Figure C), and deletion of this NLS resulted in loss of  
5 localization to the nuclei (Figure 1D). Using the 2340NLS fused to the C-terminus of dCas9  
6 (Figure 1E and F), we created a *Giardia* CRISPR interference expression vector (dCas9g1pac)  
7 that included a gRNA cassette with a *Giardia* U6 promoter and puromycin (pac) selection  
8 (Methods and Figure 1G).

### 9 ***CRISPRi-mediated knockdown of the exogenous NanoLuc reporter gene***

10 To assess the ability of CRISPRi to repress transcription in *Giardia*, we created a strain that  
11 constitutively expresses the NanoLuc (NLuc) reporter (Hall et al., 2012) from the *Giardia* MDH  
12 promoter on a plasmid with neomycin selection. We designed eight gRNAs (+53, +147, +193,  
13 +255, +285, +365, +444, +488) (Figure 2A) to target the entire coding region of the NLuc gene at  
14 approximately 50 base-pair intervals. One gRNA (-11) was designed to target just upstream of  
15 the translation start site. Seven of nine gRNAs significantly repressed NLuc luminescence by  
16 ~20-61% as compared to the NanoLucNeo strain (Figure 2B).

### 17 ***CRISPRi mediated knockdowns of kinesin-13 or kinesin-2a cause significant alterations in*** 18 ***flagellar length***

19 *Giardia* has four pairs of bilaterally symmetric flagella that are maintained at consistent  
20 equilibrium lengths (Figure 3A). *Giardia* possesses a single heterotrimeric kinesin-2 motor,  
21 consisting of kinesin-2a, 2b, and the kinesin-associated protein (KAP) that is required for  
22 flagellar assembly and maintenance (Hoeng et al., 2008). The length of a flagellum is

1 determined by the balance of kinesin-2 dependent assembly (Kozminski et al., 1995) and  
2 kinesin-13 dependent disassembly at the distal flagellar tip (Dawson et al., 2007). The  
3 dominant-negative overexpression of a rigor mutant kinesin-13 causes significant increases in  
4 the length of *Giardia's* eight flagella, larger median bodies, and cell division defects (Dawson et  
5 al., 2007). In contrast, both morpholino-based knockdown of kinesin-2b and dominant negative  
6 expression of a rigor mutant kinesin-2a result in significant flagellar shortening and mitotic  
7 defects (Hoeng et al., 2008).

8 To determine the ability of CRISPRi to knockdown endogenous genes in *Giardia*, we  
9 designed five gRNAs (-61, -55, +19, +24, +60) to target kinesin-13 (GiardiaDB GL50803\_16945)  
10 and two gRNAs (+42, +127) to target kinesin-2a (GiardiaDB GL50803\_17333). To assess the  
11 flagellar length defects of kinesin-13 and kinesin-2a knockdowns, we fixed cells and measured  
12 the length of the caudal flagella, a convenient reporter for flagellar length (Dawson et al.,  
13 2007). Four of five gRNAs targeting kinesin-13 (-61, -55, +24, +60) significantly increased the  
14 length of caudal flagella compared to a non-specific gRNA (Figure 3B,C). While both gRNAs  
15 targeting the promoter region of kinesin-13 (-61, -55) resulted in significant length increases for  
16 caudal flagella, the length defects were less severe than for the two gRNAs (+24, +60) targeting  
17 the coding region (Figure 3C). Both gRNAs targeting kinesin-2a (+42, +127) significantly  
18 decreased caudal flagellar length compared to a non-specific gRNA (Figure 3D,E).

19 To determine the degree of transcriptional repression of kinesin-13 and kinesin-2a  
20 conferred by CRISPRi knockdown, we quantified the expression of these targets in the kinesin-  
21 13 +60 and kinesin-2a +127 strains using quantitative PCR (qPCR). Expression of either target  
22 was reduced by 59% as compared to a non-specific gRNA strain (Figure 3F).

1 ***CRISPRi knockdown of MBP causes severe disc defects that are highly prevalent and persist at***  
2 ***least one week in cultured trophozoites***

3 Attachment to the host intestinal epithelium by the ventral disc – a highly ordered and complex  
4 microtubule (MT) array – is critical to *Giardia's* pathogenesis in the host (Nosala et al., 2018).  
5 The ventral disc is defined by more than 90 parallel and uniformly spaced MTs that spiral into a  
6 circular domed structure (Crossley and Holberton, 1983; Crossley and Holberton, 1985; Feely et  
7 al., 1982; Friend, 1966; Holberton, 1973; Holberton, 1981). MBP (GiardiaDB GL50803\_16343) is  
8 one of 87 proteins that localize to the ventral disc (Nosala et al., 2018), and morpholino  
9 knockdown of MBP results in ventral discs with an “open” and “flattened” conformation, as  
10 well as decreased attachment efficiency (Woessner and Dawson, 2012).

11 To test the efficacy of MBP knockdown using CRISPRi, we created three strains with  
12 gRNAs targeting either the promoter (-7) or coding regions (+11, +1566) of the gene. The  
13 proportions of aberrant ventral disc phenotypes in each knockdown strain were determined by  
14 fixing and immunostaining trophozoites for dCas9 and the ventral disc protein  $\beta$ -giardin (Baker  
15 et al., 1988). Images were scored for disc phenotype and dCas9 expression in each cell (Figure  
16 4A). In each MBP knockdown strain, the presence of an aberrant ventral disc was positively  
17 correlated with dCas9 nuclear staining (Figure 4A,C). Trophozoites positive for dCas9 nuclear  
18 staining had severe ventral disc structural defects with incompletely closed (or aberrant) discs  
19 (Figure 4A,B) as compared to the typical closed, domed disc structure (Woessner and Dawson,  
20 2012). Specifically, 46-93% of trophozoites with dCas9 nuclear staining had aberrant ventral  
21 disc structures using any of the three gRNAs (Figure 4C). Ventral discs in the non-specific gRNA  
22 strain lacked structural defects and were comparable to wild-type. Super resolution imaging



1 using structured illumination microscopy (SIM) highlights the disrupted and open ventral disc  
2 ultrastructure in the CRISPRi knockdowns (Figure 4B), with some dCas9 positive cells lacking  
3 large regions of the ventral disc (Figure 4B).

4 To assess the stability and persistence of CRISPRi knockdown phenotypes, we compared  
5 the proportion of trophozoites with aberrant ventral discs obtained via the CRISPRi knockdown  
6 to those obtained via morpholino knockdown of MBP over the course of one week.

7 Translational knockdown with morpholinos is currently the only knockdown method widely  
8 used in *Giardia*, yet morpholinos are costly and only transiently repress protein expression  
9 (Carpenter and Cande, 2009).

10 To directly compare the severity, penetrance, and persistence of aberrant discs after  
11 MBP knockdown using CRISPRi or morpholinos, we fixed and immunostained trophozoites  
12 cultured for 24, 48, 72, and 168 hours after introduction of an anti-MBP morpholino and  
13 compared them to the constitutively expressed CRISPRi MBP+11 strain. The proportion of cells  
14 with aberrant discs was comparable for both methods at 24 hours. With prolonged passage in  
15 culture, however, the penetrance of aberrant discs phenotypes in the morpholino knockdown  
16 population rapidly decreased, with significantly fewer aberrant discs present at 48, 72, and 168  
17 hours (Figure 5C). At 168 hours, no aberrant disc phenotypes were observed in the morpholino  
18 knockdown population. In contrast, the penetrance (e.g., the proportion of aberrant disc  
19 phenotypes in the CRISPRi strain) remained close to 60% of total cells for 168 hours (Figure 5C).  
20 Furthermore, more than 85% of dCas9 positive cells had aberrant disc phenotypes at 24 hours,  
21 and this high degree of penetrance persisted to 168 hours of passage in culture (Figure 5D).

22 ***Simultaneous knockdown of kinesin-13 and MBP results in trophozoites with prevalent***

## 1 ***mutant phenotypes***

2 Simultaneous repression of multiple genes is commonly used to interrogate epistatic  
3 interactions or functional redundancy of paralogous genes. The flexibility of the CRISPR/Cas9  
4 system we designed for *Giardia* permits the simultaneous targeting of multiple regions of the  
5 same target or of multiple target genes by simply including multiple gRNAs. To test these  
6 versatile aspects of CRISPRi in *Giardia*, we modified the dCas9g1pac vector to simultaneously  
7 express two different gRNAs. In short, we designed a set of primers to amplify the entire gRNA  
8 expression cassette from an existing gRNA vector and added this amplified region downstream  
9 of the gRNA cassette of a second gRNA vector (Figure 6A). Specifically, we added the MBP+11  
10 gRNA cassette to the kinesin-13+60 vector, as each of these gRNAs provided strong repression  
11 of their respective targets with distinct phenotypes (Figures 3C, 4B).

12 To assess the efficacy of targeting multiple genes with CRISPRi, we fixed and stained  
13 trophozoites expressing dCas9 and the kinesin-13+60 and MBP+11 gRNAs. Flagellar and disc  
14 phenotypes were compared to a dCas9 'dual' non-specific gRNA (dns gRNA) control strain that  
15 expressed the non-specific gRNA sequence from two gRNA cassettes. We quantified flagellar  
16 length and the presence of open discs within the same cell and found that a high proportion of  
17 the kinesin-13+60/MBP+11 cells had both mutant phenotypes (Figure 6B).

18 Caudal flagella were 16% longer in the kinesin-13+60/MBP+11 knockdown strain as  
19 compared to the dual non-specific gRNA strain. Like the single MBP+11 strain (Figure 3C),  
20 trophozoites in the kinesin-13+60/MBP+11 knockdown strain that were positive for dCas9  
21 staining had more severe defects, with caudal flagella that were 30% longer than in cells lacking  
22 dCas9 staining (Figure 6C). With respect to ventral disc phenotypes, 45% of kinesin-

1 13+60/MBP+11 knockdown trophozoites had an aberrant “open” ventral disc structure, while  
2 no ventral discs in the dual non-specific gRNA strain had structural defects (Figure 6D). As with  
3 caudal flagellar length defects, open or aberrant ventral disc phenotypes were highly prevalent  
4 in dCas9 positive cells; 74% of dCas9 positive cells had aberrant ventral discs as compared to  
5 only 10% of dCas9 negative cells (Figure 6E). Lastly, trophozoites with aberrant discs were  
6 primarily found in the fraction of cells with longer caudal flagella (Figure 6F), and especially in  
7 cells with caudal flagellar lengths greater than 10  $\mu\text{m}$  (Figure 6G).

## 8 **DISCUSSION**

9 CRISPRi is a robust alternative to RNAi-mediated gene silencing for precise knockdown of gene  
10 expression in both eukaryotic and bacterial model systems (Kampmann, 2018; Larson et al.,  
11 2013). Our successful use of CRISPRi to repress both exogenous (Figure 2) and single or multiple  
12 endogenous genes (Figures 3-6) in *Giardia* underscores the versatility of this stable, modular,  
13 and efficient gene regulation system. CRISPRi-based gene repression will rapidly change how  
14 we study basic cell biology, development, and pathogenesis in this widespread and  
15 understudied binucleate parasite.

### 16 ***Development of CRISPRi-mediated knockdown in Giardia***

17 Molecular genetic tool development in *Giardia* has focused on transient translational  
18 repression by electroporation of morpholinos (Carpenter and Cande, 2009) or on the  
19 overexpression of long double-stranded RNAs or hammerhead ribozymes for transcriptional  
20 repression (Chen et al., 2007; Dan et al., 2000). While CRISPR/Cas9-mediated knockout  
21 strategies have recently been used for genome engineering in several parasitic protists (Ren

1 and Gupta, 2017), this is the first demonstration of CRISPRi-mediated transcriptional repression  
2 in these organisms.

3 The *Giardia* CRISPRi expression system is compact and self-contained on a single  
4 episomal plasmid (Figure 1G). Expression of the modular dCas9 and gRNA CRISPRi cassettes  
5 does not require *Giardia* host or viral factors as is required for antisense (Rivero et al., 2010) or  
6 hammerhead ribozyme-mediated transcriptional repression (Chen et al., 2007; Dan et al.,  
7 2000). A native *Giardia* NLS is required for targeting of the Cas9 or dCas9/gRNA DNA  
8 recognition complex to both nuclei (Figure 1E-G). Once imported into the nuclei, the Cas9/gRNA  
9 complex is targeted to a specific genomic locus where it sterically interferes with RNA  
10 polymerase or transcription factor binding, or with transcriptional elongation, as has been  
11 shown in bacteria or other eukaryotes (Larson et al., 2013). The ability to direct dCas9 or other  
12 native transcriptional elements to both nuclei in *Giardia* will enable the modulation of  
13 transcriptional networks not only by repression, but also by differential expression through the  
14 fusion of dCas9 to *Giardia*-specific transcription factors (Kampmann, 2018).

15 The choice of gRNA target site impacts the degree of transcriptional repression in every  
16 CRISPRi system (Larson et al., 2013). In both bacteria and human cell lines, targeting gRNAs  
17 close to the translation start site results in stronger repression (Gilbert et al., 2013; Qi et al.,  
18 2013). We systematically targeted eight sites within the coding region of exogenously  
19 expressed NanoLuc (NLuc), a luminescent reporter gene, to determine how gRNA positioning  
20 might influence the magnitude of transcriptional repression in *Giardia* (Figure 2).

21 Guide RNAs targeting all regions of the NanoLuc reporter substantially repressed  
22 luminescence; however, there was no correlation between gRNA target site position and the

1 magnitude of repression. Because we used a native *Giardia* promoter (MDH) for NanoLuc  
2 expression, we could not target this region without potentially altering expression of the native  
3 MDH gene. This limits our interpretation of knockdown results for the gRNA that targeted the  
4 region immediately upstream of NanoLuc. For the kinesin-13 and MBP CRISPRi knockdowns,  
5 however, significant transcriptional repression and aberrant phenotypes were observed for  
6 gRNAs targeting regions both upstream and downstream of the translation start site (Figure 3  
7 and Figure 4). More robust and persistent phenotypes for kinesin-2a, kinesin-13, and MBP were  
8 associated with gRNAs that targeted the coding regions of these genes, which is consistent with  
9 the inhibition of transcriptional elongation, rather than inhibition of transcriptional initiation  
10 (Larson et al., 2013). Furthermore, due to the ill-defined nature of *Giardia* promoters and the  
11 limited length of intergenic regions (Davis-Hayman and Nash, 2002), we recommend that  
12 several gRNAs be designed to target the coding region for successful repression in *Giardia*.

### 13 ***Highly penetrant and persistent transcriptional repression of endogenous genes***

14 Using the eight flagella, motile *Giardia* trophozoites colonize the upper gastrointestinal tract  
15 (Dawson and House, 2010b), attaching extracellularly to the intestinal villi using the ventral  
16 disc, thereby resisting peristaltic flow (Elmendorf et al., 2003 ; Nosala and Dawson, 2015). Our  
17 demonstration of efficient and highly penetrant CRISPRi-mediated transcriptional repression of  
18 three endogenous cytoskeletal proteins (Figures 3-6) highlights the versatility of this method to  
19 interrogate the contribution of the cytoskeleton to parasite motility and attachment.

20 Each of the CRISPRi-mediated knockdowns of endogenous genes resulted in cytoskeletal  
21 phenotypes that were consistent with phenotypes observed in *Giardia* in prior studies  
22 (Carpenter and Cande, 2009; Dawson et al., 2007; Hoeng et al., 2008; Woessner and Dawson,

1 2012). In *Giardia* and other flagellates, alterations in flagellar assembly or disassembly dynamics  
2 cause flagellar length defects (Carpenter and Cande, 2009; Dawson et al., 2007; Hoeng et al.,  
3 2008; Sloboda, 2005; Woessner and Dawson, 2012). Both electroporation of anti-kinesin-2b  
4 morpholinos (Carpenter and Cande, 2009), and inducible dominant negative overexpression of  
5 kinesin-2a (Hoeng et al., 2008) limit the degree of IFT-mediated assembly, resulting in shorter  
6 flagella in *Giardia*. In contrast, overexpression of a dominant negative kinesin-13 results in  
7 increased length of all eight flagella by decreasing the rate of disassembly (Dawson et al., 2007;  
8 Hoeng et al., 2008). When we knocked down these kinesins using CRISPRi with gRNAs targeting  
9 upstream or downstream of the translation start site, we observed flagellar length increases  
10 (up to 60% longer for kinesin-13, Figure 3B,C) or decreases (up to 30% shorter for kinesin-2a,  
11 Figure 3D,E). These length variations are comparable to those seen with morpholino  
12 knockdowns or overexpression of dominant negatives for kinesin-13 or kinesin-2a (Dawson et  
13 al., 2007; Hoeng et al., 2008), underscoring the evolutionarily conserved and essential roles  
14 these two kinesins in flagellar length regulation in *Giardia*.

15 *Giardia's* ventral disc is essential for attachment to the host, and is composed of nearly  
16 90 proteins (Nosala et al., 2018). The CRISPRi-mediated knockdown of the disc-associated  
17 protein median body protein (MBP) also confirms the same “open” and “flat” disc phenotype  
18 (Figure 4) observed using transient morpholino translational knockdowns (Woessner and  
19 Dawson, 2012) (Figure 5A,B). Similar to prior morpholino knockdowns, we also saw extreme  
20 defects in ventral disc structure, including partial discs that were most evident with the gRNA  
21 targeting the +11 position of the MBP coding region (Figure 4B).

1           The overall penetrance and stability of CRISPRi knockdown mutant phenotypes in a  
2 population is critical for evaluating the efficacy of the *Giardia* CRISPRi knockdown system. For  
3 CRISPRi MBP knockdown with any of three gRNAs, the degree of dCas9 expression was highly  
4 correlated with aberrant disc structure (Figure 4C). The penetrance of aberrant disc phenotypes  
5 was 46% to 93% in the population of dCas9 positive cells as compared to 4% to 25% penetrance  
6 in dCas9 negative cells. Thus, in addition to testing multiple candidate gRNAs for severity of  
7 phenotypes, we also advocate the use of FACS or similar methods of cell sorting to enrich for a  
8 more homogeneous population expressing dCas9, as has been done in other CRISPRi systems  
9 (Gilbert et al., 2013).

10           The stability or persistence of the CRISPRi knockdown phenotype in a population over  
11 many generations is also a key feature of the *Giardia* CRISPRi system, which includes a positive  
12 selectable marker (*pac*) to allow maintenance of the CRISPRi plasmid under puromycin  
13 selection. By passaging the MPB+11 strain repeatedly for one week, we showed that the  
14 penetrance of the aberrant disc phenotype remained close to 60% of total cells for up to 168  
15 hours (Figure 5C). Between 80% to 97% of dCas9 positive cells had open, incomplete ventral  
16 discs at any time point up to 168 hours in culture (Figure 5D). Thus, CRISPRi knockdowns are  
17 not only highly penetrant but also highly stable as compared to transient knockdowns with  
18 morpholinos, wherein the prevalence of cells with aberrant discs rapidly decreased in the  
19 population after 48 hours and was completely lost by 168 hours (Figure 5).

20           As compared to transient and costly morpholino knockdowns, CRISPRi produces stable  
21 knockdown strains that are positively selected and can be archived and evaluated at any time.  
22 The degree of morpholino knockdown depends on the initial transformation efficiency, and

1 morpholino knockdowns require analysis immediately after electroporation, which could  
2 introduce phenotypic artefacts or variability. In contrast, multiple CRISPRi knockdown strains  
3 can be made using one or more gRNAs that target the same gene, permitting a comparison of  
4 mutant phenotypes in different knockdown strains (Figures 2-5). Furthermore, the generation  
5 of CRISPRi knockdown vectors can be multiplexed and only requires the purchase and annealing  
6 of two short oligomers.

### 7 ***Knockdown of multiple genes by the simultaneous expression of multiple gRNAs***

8 The modular design of the *Giardia* gRNA expression cassette allows for concatenation of two or  
9 more gRNAs to target multiple sites on a single gene, or the targeting of more than one *Giardia*  
10 gene for phenotypic analysis (Figure 6). Simultaneous CRISPRi knockdown of both the flagellar  
11 length regulator kinesin-13 and the disc-associated protein MBP resulted in highly penetrant  
12 flagellar length and disc defects (Figure 6). Furthermore, the majority of cells with flagellar  
13 length defects also had aberrant discs (Figure 6F), and the cells with the longest flagellar lengths  
14 were exclusively those with open, incomplete discs. Thus, the ability to create stable CRISPRi  
15 knockdown strains with defects in multiple genes now allows the evaluation of the functional  
16 redundancy of similar and paralogous genes in *Giardia*, as well as the interrogation of epistatic  
17 interactions of genes in a biochemical pathway.

### 18 ***Using CRISPRi to identify and evaluate genes critical in giardiasis***

19 Over 40 percent of *Giardia*'s 6000 genes encode "hypothetical" proteins that lack similarity to  
20 proteins in the human host (Morrison et al., 2007). Many hypothetical proteins are highly  
21 expressed during *in vivo* infections yet lack any known cellular function (Pham et al., 2017).  
22 Rapid and stable CRISPRi knockdown enables the functional evaluation of such hypothetical



1 genes as druggable targets for giardiasis. Combining stable CRISPRi knockdowns with our  
2 recently developed bioluminescent imaging (BLI) to monitor temporal and spatial patterns of  
3 *Giardia* infection dynamics and metabolism in the host (Barash, 2017) will allow the  
4 examination of *Giardia* mutants with respect to *in vivo* fitness, colonization, or encystation  
5 defects.

6  
7 The lack of forward genetic tools for *Giardia* has limited our ability to define genes that are  
8 required for basic parasite biology. CRISPRi knockdowns with partial transcriptional repression  
9 facilitate the identification of genes with severe fitness costs, as the complete knockdown or  
10 knockout of essential genes results in lethal phenotypes. As compared to reverse genetic  
11 approaches, the use of untargeted, genome-wide CRISPRi screens (Kampmann, 2018; Larson et  
12 al., 2013) could identify essential genes critical for *Giardia* growth, differentiation, and  
13 pathogenesis.

14

#### 15 **ACCESSION NUMBERS**

16 The *Giardia* CRISPRi and NanoLuc reporter vectors have been deposited in GenBank with the  
17 following accession numbers: dCas9g1pac (MH037009), NanoLucNeo (MH037010).

18

#### 19 **ACKNOWLEDGEMENTS**

20 This work was supported by NIH/NIAID awards R01AI077571 and R21AI119791-01 to SCD.  
21 Plasmids JDS246 (Addgene #43861) and MSP712 (Addgene #65768) were gifts from Keith  
22 Joung. Plasmid pKS\_mNeonGreen-N11\_NEO was a gift from Alex Paredez (University of

1 Washington, Seattle). The anti-beta-giardin antibody was a gift of Mark Jenkins (USDA, ARS,  
2 Animal Parasitic Diseases Laboratory). We thank the MCB Light Microscopy Imaging Facility, a  
3 UC Davis Campus Core Research Facility, for the use of the Nikon N-SIM Structured Illumination  
4 Super-resolution Microscope.

## 5 **FIGURE LEGENDS**

6 **Figure 1. A *Giardia*-specific nuclear localization signal (NLS) is necessary and sufficient to**  
7 **localize Cas9 and dCas9 to both nuclei.**

8 C-terminal GFP-tagged Cas9 with either a single C-terminal SV40 NLS (A) or dual N- and C-  
9 terminal SV40 NLSs (B) localizes only to the cytoplasm. The presence of a *Giardia*-specific native  
10 34-amino acid C-terminal NLS from the *Giardia* protein GL50803\_2340 (2340NLS) is necessary  
11 for the localization of 2340GFP to both nuclei (C, D). The C-terminal addition of the 2340NLS to  
12 Cas9 is sufficient for localization to both nuclei as shown by immunostaining with anti-Cas9 (E)  
13 or anti-HA (F). A schematic of the *Giardia* CRISPRi vector dCas9g1pac and the localization of  
14 dCas9 as determined by anti-Cas9 antibody staining are shown in G. The vector includes  
15 catalytically inactive dCas9 with a C-terminal 2340NLS and a 3XHA epitope tag driven by the  
16 *Giardia* malate dehydrogenase promoter ( $P_{MDH}$ ), and puromycin resistance marker (pac) for  
17 positive selection in *Giardia*. The gRNA cassette is expressed using the *Giardia* U6 spliceosomal  
18 RNA pol III promoter, and includes inverted BbsI restriction sites for rapid cloning of specific  
19 gRNA target sequences, followed by the gRNA scaffold sequence (SCF). Additional gRNA  
20 cassettes are added at the SacI site (Methods). Anti-Cas9 immunostaining indicates over 50% of  
21 cells express dCas9 in both nuclei. All scale bars = 5 $\mu$ m.

1  
2 **Figure 2. CRISPRi-mediated knockdown of exogenously expressed NanoLuc in Giardia.** Nine  
3 gRNAs were designed to repress transcription of the luciferase reporter gene NanoLuc  
4 expressed exogenously from the *Giardia* MDH promoter (A). Eight gRNAs targeted the coding  
5 region of the NanoLuc gene and one gRNA (-11) targeted the region immediately upstream of  
6 the translation start site. Target positions are numbered relative to the translational start site  
7 ATG and are located 3 bases upstream of the PAM sequence (NGG) for each gRNA. Relative  
8 luminescence per cell is plotted for each gRNA designed to repress Nanoluc expression. In B,  
9 the mean luminescence per cell for two independent transformations is compared between the  
10 different luciferase knockdown strains. Error bars indicate 95% confidence intervals. The  
11 significance of luciferase knockdown relative to a non-specific gRNA control was assessed using  
12 unpaired t-test, with ns = not significant, \* $p \leq 0.05$ , \*\* $\leq 0.01$  (Methods).

13  
14 **Figure 3. CRISPRi mediated knockdowns of kinesin-13 or kinesin-2a cause significant**  
15 **alterations in flagellar length**  
16 *Giardia* has four pairs of bilaterally symmetric flagella – anterior (AF), ventral (VF),  
17 posteriolateral (PF), and caudal (CF, orange) – with distinct equilibrium interphase lengths (A).  
18 Representative images and quantification of caudal flagellar length are shown for the CRISPRi-  
19 mediated knockdown of two endogenous kinesins known to regulate flagellar length in *Giardia*:  
20 kinesin-13 +60 gRNA (B) and kinesin-2a +127 gRNA (D) as compared to a non-specific gRNA  
21 strain (B and D, see Methods). Yellow traces highlight representative caudal flagella for  
22 flagellar length measurements. Scale bars = 5  $\mu\text{m}$ . In C, average caudal flagellar length for five

1 kinesin-13 knockdown strains with gRNAs targeting the upstream region (-61, -55) or coding  
2 region (+19, +24, and +60) are compared to the strain expressing a non-specific gRNA (ns  
3 gRNA). In E, the average caudal flagellar length is quantified for strains with gRNAs targeting  
4 +42 and +127 positions of kinesin-2a as compared to a non-specific gRNA expressing strain (ns  
5 gRNA). All images were acquired from three independent experiments, with more than 70 cells  
6 analyzed for each treatment group. In F, the decrease in gene expression of kinesin 13 (red) in  
7 the kinesin-13 +60 strain and kinesin-2a (blue) in the kinesin-2a +127 strain is shown relative to  
8 expression levels of the two kinesins in a non-specific gRNA expressing strain (dotted line  
9 indicates expression in the ns gRNA strain). Kinesin gene expression is normalized to the *Giardia*  
10 GAPDH gene from two independent experiments. In all panels, error bars indicate 95%  
11 confidence intervals, and significance was assessed using unpaired t-test with ns = not  
12 significant, \* $p \leq 0.05$ , \*\* $\leq 0.01$ , \*\*\* $\leq 0.001$ .

13

14 **Figure 4. CRISPRi knockdown of the ventral disc protein MBP causes severe structural defects**

15 In A, widefield images are presented showing immunostaining of both the disc protein  $\beta$ -giardin  
16 (left) and dCas9 (middle) in strains expressing a non-specific gRNA, or CRISPRi gRNAs designed  
17 to knock down the median body protein (MBP(-7) gRNA, MBP+11 gRNA, and MBP+1566 gRNA).  
18 Scale bars are 5  $\mu$ m. In B, representative structured illumination microscopy (SIM) images of  
19 the MBP+11 gRNA strain immunostained for  $\beta$ -giardin (left) and dCas9 (right) highlight the  
20 characteristic “open” disc conformation (arrows) observed with morpholino knockdown of MBP  
21 ((Woessner and Dawson, 2012), and see Figure 5B below). Scale bar = 2  $\mu$ m. In C, the  
22 proportion of aberrant disc phenotypes in strains expressing MBP(-7), MBP+11, and MBP+1566

1 gRNAs is quantified and compared in cells scored as dCas9 positive (green) or negative (gray).  
2 Three independent experiments were performed, with more than 200 cells analyzed for each  
3 gRNA. Error bars indicate 95% confidence intervals. Significance was assessed using unpaired t-  
4 test with \*\* $p \leq 0.01$  and \*\*\* $p \leq 0.001$ .

5

6 **Figure 5. Aberrant disc phenotypes in the CRISPRi MBP+11 knockdown strain are highly**  
7 ***penetrant and stable***

8 The open disc phenotype of the MBP+11 gRNA strain (A) is similar to aberrant disc phenotypes  
9 observed using an anti-MBP morpholino (B, and see (Woessner and Dawson, 2012)). DAPI =  
10 green, anti-Cas9 = pink. Scale bar = 5  $\mu\text{m}$ . Unlike the anti-MBP morpholino knockdown (orange),  
11 the open disc phenotype of the CRISPRi MBP+11 strain (green) is stable in cultured cells for at  
12 least one week (C). The proportion of dCas9+ (green) cells with the open disc phenotype is also  
13 consistent and highly penetrant in the MBP+11 strain (D). Three independent experiments were  
14 performed, with more than 75 cells analyzed for each gRNA. Error bars indicate 95% confidence  
15 intervals. Significance was assessed using unpaired t-test with ns = not significant, \*\* $p \leq 0.01$   
16 and \*\*\* $p \leq 0.001$ .

17

18 **Figure 6. Simultaneous knockdown of kinesin-13 and MBP using two gRNAs to target both**  
19 **genes**

20 For simultaneous expression of two gRNAs targeting both MBP and kinesin-13, we cloned the  
21 two gRNA cassettes g1 (MBP+11) and g2 (kinesin-13+60 in tandem. Scaffold sequence = SCF (A).  
22 The gRNA cassette is expressed using the *Giardia* U6 spliceosomal RNA pol III promoter ( $P_{U6}$ ). In

1 B, representative images for the knockdown of both kinesin-13 and MBP in a strain expressing  
2 both kinesin-13+60 and MBP+11 gRNAs highlight a cell with both the open disc and long flagella  
3 phenotypes as compared to a cell expressing the dual non-specific gRNAs (dns gRNA). dCas9  
4 positive (red) cells of the K13+60/MBP+11 dual knockdown strain had significantly longer  
5 caudal flagella as compared to dCas9 negative cells or those expressing the non-specific gRNAs  
6 (C). Aberrant disc phenotypes (green) were observed in over 45% of cells in the  
7 K13+60/MBP+11 dual knockdown strain (D), with high penetrance of aberrant disc phenotypes  
8 in dCas9+ cells (E). Cells with aberrant discs (green) also had significantly longer caudal flagella  
9 than dns gRNA or K13+60/MBP+11 cells with complete discs (blue) (F). Shifts in the caudal  
10 flagellar length distributions (represented using kernel density estimates) show that cells with  
11 long flagella have open disc phenotypes (G). Two independent experiments were performed,  
12 with more than 95 cells analyzed for each gRNA. Error bars indicate 95% confidence intervals.  
13 Significance was assessed using unpaired t-test with ns = not significant, \* $p \leq 0.01$  and  
14 \*\* $p \leq 0.001$ .

1   **REFERENCES**

2

3   Adam, R.D., E.W. Dahlstrom, C.A. Martens, D.P. Bruno, K.D. Barbian, S.M. Ricklefs, M.M.

4         Hernandez, N.P. Narla, R.B. Patel, S.F. Porcella, and T.E. Nash. 2013. Genome sequencing  
5         of *Giardia lamblia* genotypes A2 and B isolates (DH and GS) and comparative analysis  
6         with the genomes of genotypes A1 and E (WB and Pig). *Genome Biol Evol.* 5:2498-2511.

7   Aurrecochea, C., J. Brestelli, B.P. Brunk, J.M. Carlton, J. Dommer, S. Fischer, B. Gajria, X. Gao, A.

8         Gingle, G. Grant, O.S. Harb, M. Heiges, F. Innamorato, J. Iodice, J.C. Kissinger, E.

9         Kraemer, W. Li, J.A. Miller, H.G. Morrison, V. Nayak, C. Pennington, D.F. Pinney, D.S.

10         Roos, C. Ross, C.J. Stoeckert, Jr., S. Sullivan, C. Treatman, and H. Wang. 2009. GiardiaDB  
11         and TrichDB: integrated genomic resources for the eukaryotic protist pathogens *Giardia*  
12         *lamblia* and *Trichomonas vaginalis*. *Nucleic Acids Res.* 37:D526-530.

13   Baker, D.A., D.V. Holberton, and J. Marshall. 1988. Sequence of a giardin subunit cDNA from  
14         *Giardia lamblia*. *Nucleic Acids Res.* 16:7177.

15   Ball, G., J. Demmerle, R. Kaufmann, I. Davis, I.M. Dobbie, and L. Schermelleh. 2015. SIMcheck: a  
16         Toolbox for Successful Super-resolution Structured Illumination Microscopy. *Sci Rep.*  
17         5:15915.

18   Barash, N., Nosala, C, Pham, JK, McNally, SG, Gourguechon, S., McCarthy-Sinclair, B, and SC  
19         Dawson. 2017. *Giardia* colonizes and encysts in high density foci in the murine small  
20         intestine. *mSphere.* 2:e00343-00316.

- 1 Barat, L.M., and P.B. Bloland. 1997. Drug resistance among malaria and other parasites. *Infect*  
2 *Dis Clin North Am.* 11:969-987.
- 3 Bartelt, L.A., and R.B. Sartor. 2015. Advances in understanding Giardia: determinants and  
4 mechanisms of chronic sequelae. *F1000Prime Rep.* 7:62.
- 5 Bernander, R., J.E. Palm, and S.G. Svard. 2001. Genome ploidy in different stages of the Giardia  
6 lamblia life cycle. *Cellular microbiology.* 3:55-62.
- 7 Carpenter, M.L., and W.Z. Cande. 2009. Using morpholinos for gene knockdown in *Giardia*  
8 *intestinalis.* *Eukaryot Cell.* 8:916-919.
- 9 Chen, L., J. Li, X. Zhang, Q. Liu, J. Yin, L. Yao, Y. Zhao, and L. Cao. 2007. Inhibition of krr1 gene  
10 expression in *Giardia canis* by a virus-mediated hammerhead ribozyme. *Vet Parasitol.*  
11 143:14-20.
- 12 Cong, L., F.A. Ran, D. Cox, S. Lin, R. Barretto, N. Habib, P.D. Hsu, X. Wu, W. Jiang, L.A. Marraffini,  
13 and F. Zhang. 2013. Multiplex genome engineering using CRISPR/Cas systems. *Science.*  
14 339:819-823.
- 15 Crossley, R., and D.V. Holberton. 1983. Characterization of proteins from the cytoskeleton of  
16 *Giardia lamblia.* *Journal of cell science.* 59:81-103.
- 17 Crossley, R., and D.V. Holberton. 1985. Assembly of 2.5 nm filaments from giardin, a protein  
18 associated with cytoskeletal microtubules in *Giardia.* *Journal of cell science.* 78:205-231.



- 1 Dan, M., A.L. Wang, and C.C. Wang. 2000. Inhibition of pyruvate-ferredoxin oxidoreductase  
2 gene expression in *Giardia lamblia* by a virus-mediated hammerhead ribozyme.  
3 *Molecular microbiology*. 36:447-456.
- 4 Davis, J.J., and G.J. Olsen. 2010. Modal codon usage: assessing the typical codon usage of a  
5 genome. *Mol Biol Evol*. 27:800-810.
- 6 Davis-Hayman, S.R., and T.E. Nash. 2002. Genetic manipulation of *Giardia lamblia*. *Mol Biochem*  
7 *Parasitol*. 122:1-7.
- 8 Dawson, S.C., and S.A. House. 2010a. Imaging and analysis of the microtubule cytoskeleton in  
9 *Giardia*. *Methods Cell Biol*. 97:307-339.
- 10 Dawson, S.C., and S.A. House. 2010b. Life with eight flagella: flagellar assembly and division in  
11 *Giardia*. *Current opinion in microbiology*. 13:480-490.
- 12 Dawson, S.C., M.S. Sagolla, J.J. Mancuso, D.J. Woessner, S.A. House, L. Fritz-Laylin, and W.Z.  
13 Cande. 2007. Kinesin-13 regulates flagellar, interphase, and mitotic microtubule  
14 dynamics in *Giardia intestinalis*. *Eukaryot Cell*. 6:2354-2364.
- 15 Ebnetter, J.A., S.D. Heusser, E.M. Schraner, A.B. Hehl, and C. Faso. 2016. Cyst-Wall-Protein-1 is  
16 fundamental for Golgi-like organelle neogenesis and cyst-wall biosynthesis in *Giardia*  
17 *lamblia*. *Nat Commun*. 7:13859.
- 18 Einarsson, E., S. Ma'ayeh, and S.G. Svard. 2016. An up-date on *Giardia* and giardiasis. *Current*  
19 *opinion in microbiology*. 34:47-52.

- 1 Elmendorf, H.G., S.C. Dawson, and J.M. McCaffery. 2003. The cytoskeleton of *Giardia lamblia*.  
2 *Int J Parasitol.* 33:3-28.
- 3 Elmendorf, H.G., S.M. Singer, and T.E. Nash. 2000. Targeting of proteins to the nuclei of *Giardia*  
4 *lamblia*. *Mol Biochem Parasitol.* 106:315-319.
- 5 Feely, D.E., J.V. Schollmeyer, and S.L. Erlandsen. 1982. *Giardia* spp.: distribution of contractile  
6 proteins in the attachment organelle. *Exp Parasitol.* 53:145-154.
- 7 Franzen, O., J. Jerlstrom-Hultqvist, E. Castro, E. Sherwood, J. Ankarklev, D.S. Reiner, D. Palm,  
8 J.O. Andersson, B. Andersson, and S.G. Svard. 2009. Draft genome sequencing of *Giardia*  
9 *intestinalis* assemblage B isolate GS: is human giardiasis caused by two different  
10 species? *PLoS Pathog.* 5:e1000560.
- 11 Friend, D.S. 1966. The fine structure of *Giardia muris*. *J Cell Biol.* 29:317-332.
- 12 Gibson, D.G., L. Young, R.Y. Chuang, J.C. Venter, C.A. Hutchison, 3rd, and H.O. Smith. 2009.  
13 Enzymatic assembly of DNA molecules up to several hundred kilobases. *Nature*  
14 *methods.* 6:343-345.
- 15 Gilbert, L.A., M.H. Larson, L. Morsut, Z. Liu, G.A. Brar, S.E. Torres, N. Stern-Ginossar, O.  
16 Brandman, E.H. Whitehead, J.A. Doudna, W.A. Lim, J.S. Weissman, and L.S. Qi. 2013.  
17 CRISPR-mediated modular RNA-guided regulation of transcription in eukaryotes. *Cell.*  
18 154:442-451.

- 1 Gourguechon, S., and W.Z. Cande. 2011. Rapid tagging and integration of genes in *Giardia*  
2 *intestinalis*. *Eukaryotic Cell*. 10:142-145.
- 3 Grzybek, M., A. Golonko, A. Gorska, K. Szczepaniak, A. Strachecka, A. Lass, and P. Lisowski.  
4 2018. The CRISPR/Cas9 system sheds new lights on the biology of protozoan parasites.  
5 *Appl Microbiol Biotechnol*. 102:4629-4640.
- 6 Hagen, K.D., M.P. Hirakawa, S.A. House, C.L. Schwartz, J.K. Pham, M.J. Cipriano, M.J. De La  
7 Torre, A.C. Sek, G. Du, B.M. Forsythe, and S.C. Dawson. 2011. Novel structural  
8 components of the ventral disc and lateral crest in *Giardia intestinalis*. *PLoS Negl Trop*  
9 *Dis*. 5:e1442.
- 10 Hall, M.P., J. Unch, B.F. Binkowski, M.P. Valley, B.L. Butler, M.G. Wood, P. Otto, K. Zimmerman,  
11 G. Vidugiris, T. Machleidt, M.B. Robers, H.A. Benink, C.T. Eggers, M.R. Slater, P.L.  
12 Meisenheimer, D.H. Klaubert, F. Fan, L.P. Encell, and K.V. Wood. 2012. Engineered  
13 luciferase reporter from a deep sea shrimp utilizing a novel imidazopyrazinone  
14 substrate. *ACS Chem Biol*. 7:1848-1857.
- 15 Hanevik, K., R. Bakken, H.R. Brattbakk, C.S. Saghaug, and N. Langeland. 2015. Whole genome  
16 sequencing of clinical isolates of *Giardia lamblia*. *Clin Microbiol Infect*. 21:192 e191-193.
- 17 Hardin, W.R., R. Li, J. Xu, A.M. Shelton, G.C.M. Alas, V.N. Minin, and A.R. Paredez. 2017. Myosin-  
18 independent cytokinesis in *Giardia* utilizes flagella to coordinate force generation and  
19 direct membrane trafficking. *Proc Natl Acad Sci U S A*. 114:E5854-E5863.
- 20 Heyworth, M.F. 2014. Immunological aspects of *Giardia* infections. *Parasite*. 21:55.

- 1 Hoeng, J.C., S.C. Dawson, S.A. House, M.S. Sagolla, J.K. Pham, J.J. Mancuso, J. Lowe, and W.Z.  
2 Cande. 2008. High-resolution crystal structure and in vivo function of a kinesin-2  
3 homologue in *Giardia intestinalis*. *Mol Biol Cell*. 19:3124-3137.
- 4 Holberton, D.V. 1973. Fine structure of the ventral disk apparatus and the mechanism of  
5 attachment in the flagellate *Giardia muris*. *Journal of cell science*. 13:11-41.
- 6 Holberton, D.V. 1981. Arrangement of subunits in microribbons from *Giardia*. *Journal of cell*  
7 *science*. 47:167-185.
- 8 Horlock-Roberts, K., C. Reaume, G. Dayer, C. Ouellet, N. Cook, and J. Yee. 2017. Drug-Free  
9 Approach To Study the Unusual Cell Cycle of *Giardia intestinalis*. *mSphere*. 2.
- 10 House, S.A., D.J. Richter, J.K. Pham, and S.C. Dawson. 2011. *Giardia* flagellar motility is not  
11 directly required to maintain attachment to surfaces. *PLoS Pathog*. 7:e1002167.
- 12 Hudson, A.J., A.N. Moore, D. Elniski, J. Joseph, J. Yee, and A.G. Russell. 2012. Evolutionarily  
13 divergent spliceosomal snRNAs and a conserved non-coding RNA processing motif in  
14 *Giardia lamblia*. *Nucleic Acids Res*. 40:10995-11008.
- 15 Jiang, W., A.J. Brueggeman, K.M. Horken, T.M. Plucinak, and D.P. Weeks. 2014. Successful  
16 transient expression of Cas9 and single guide RNA genes in *Chlamydomonas reinhardtii*.  
17 *Eukaryot Cell*. 13:1465-1469.
- 18 Jost, M., Y. Chen, L.A. Gilbert, M.A. Horlbeck, L. Krenning, G. Menchon, A. Rai, M.Y. Cho, J.J.  
19 Stern, A.E. Prota, M. Kampmann, A. Akhmanova, M.O. Steinmetz, M.E. Tanenbaum, and

- 1 J.S. Weissman. 2017. Combined CRISPRi/a-Based Chemical Genetic Screens Reveal that  
2 Rigosertib Is a Microtubule-Destabilizing Agent. *Mol Cell*. 68:210-223 e216.
- 3 Kabnick, K.S., and D.A. Peattie. 1990. In situ analyses reveal that the two nuclei of *Giardia*  
4 *lamblia* are equivalent. *Journal of cell science*. 95 ( Pt 3):353-360.
- 5 Kaczmarzyk, D., I. Cengic, L. Yao, and E.P. Hudson. 2018. Diversion of the long-chain acyl-ACP  
6 pool in *Synechocystis* to fatty alcohols through CRISPRi repression of the essential  
7 phosphate acyltransferase PlsX. *Metab Eng*. 45:59-66.
- 8 Kampmann, M. 2018. CRISPRi and CRISPRa Screens in Mammalian Cells for Precision Biology  
9 and Medicine. *ACS Chem Biol*. 13:406-416.
- 10 Kleinstiver, B.P., M.S. Prew, S.Q. Tsai, V.V. Topkar, N.T. Nguyen, Z. Zheng, A.P. Gonzales, Z. Li,  
11 R.T. Peterson, J.R. Yeh, M.J. Aryee, and J.K. Joung. 2015. Engineered CRISPR-Cas9  
12 nucleases with altered PAM specificities. *Nature*. 523:481-485.
- 13 Kozminski, K.G., P.L. Beech, and J.L. Rosenbaum. 1995. The *Chlamydomonas* kinesin-like protein  
14 FLA10 is involved in motility associated with the flagellar membrane. *J Cell Biol*.  
15 131:1517-1527.
- 16 Krtkova, J., and A.R. Paredez. 2017. Use of Translation Blocking Morpholinos for Gene  
17 Knockdown in *Giardia lamblia*. *Methods Mol Biol*. 1565:123-140.
- 18 Land, K.M., and P.J. Johnson. 1999. Molecular basis of metronidazole resistance in pathogenic  
19 bacteria and protozoa. *Drug Resist Updat*. 2:289-294.

- 1 Larson, M.H., L.A. Gilbert, X. Wang, W.A. Lim, J.S. Weissman, and L.S. Qi. 2013. CRISPR  
2 interference (CRISPRi) for sequence-specific control of gene expression. *Nature*  
3 *protocols*. 8:2180-2196.
- 4 Liu, X., C. Gallay, M. Kjos, A. Domenech, J. Slager, S.P. van Kessel, K. Knoop, R.A. Sorg, J.R.  
5 Zhang, and J.W. Veening. 2017. High-throughput CRISPRi phenotyping identifies new  
6 essential genes in *Streptococcus pneumoniae*. *Mol Syst Biol*. 13:931.
- 7 Morrison, H.G., A.G. McArthur, F.D. Gillin, S.B. Aley, R.D. Adam, G.J. Olsen, A.A. Best, W.Z.  
8 Cande, F. Chen, M.J. Cipriano, B.J. Davids, S.C. Dawson, H.G. Elmendorf, A.B. Hehl, M.E.  
9 Holder, S.M. Huse, U.U. Kim, E. Lasek-Nesselquist, G. Manning, A. Nigam, J.E. Nixon, D.  
10 Palm, N.E. Passamaneck, A. Prabhu, C.I. Reich, D.S. Reiner, J. Samuelson, S.G. Svard, and  
11 M.L. Sogin. 2007. Genomic minimalism in the early diverging intestinal parasite *Giardia*  
12 *lamblia*. *Science*. 317:1921-1926.
- 13 Nguyen Ba, A.N., A. Pogoutse, N. Provar, and A.M. Moses. 2009. NLStradamus: a simple Hidden  
14 Markov Model for nuclear localization signal prediction. *BMC Bioinformatics*. 10:202.
- 15 Nosala, C., and S.C. Dawson. 2015. The Critical Role of the Cytoskeleton in the Pathogenesis of  
16 *Giardia*. *Curr Clin Microbiol Rep*. 2:155-162.
- 17 Nosala, C., K.D. Hagen, and S.C. Dawson. 2018. 'Disc-o-Fever': Getting Down with *Giardia*'s  
18 Groovy Microtubule Organelle. *Trends Cell Biol*. 28:99-112.

- 1 Paredez, A.R., Z.J. Assaf, D. Sept, L. Timofejeva, S.C. Dawson, C.J. Wang, and W.Z. Cande. 2011.  
2 An actin cytoskeleton with evolutionarily conserved functions in the absence of  
3 canonical actin-binding proteins. *Proc Natl Acad Sci U S A*. 108:6151-6156.
- 4 Pham, J.K., C. Nosala, E.Y. Scott, K.F. Nguyen, K.D. Hagen, H.N. Starcevich, and S.C. Dawson.  
5 2017. Transcriptomic Profiling of High-Density Giardia Foci Encysting in the Murine  
6 Proximal Intestine. *Front Cell Infect Microbiol*. 7:227.
- 7 Piatek, A., Z. Ali, H. Baazim, L. Li, A. Abulfaraj, S. Al-Shareef, M. Aouida, and M.M. Mahfouz.  
8 2015. RNA-guided transcriptional regulation in planta via synthetic dCas9-based  
9 transcription factors. *Plant Biotechnol J*. 13:578-589.
- 10 Poxleitner, M.K., M.L. Carpenter, J.J. Mancuso, C.J. Wang, S.C. Dawson, and W.Z. Cande. 2008.  
11 Evidence for karyogamy and exchange of genetic material in the binucleate intestinal  
12 parasite *Giardia intestinalis*. *Science*. 319:1530-1533.
- 13 Qi, L.S., M.H. Larson, L.A. Gilbert, J.A. Doudna, J.S. Weissman, A.P. Arkin, and W.A. Lim. 2013.  
14 Repurposing CRISPR as an RNA-guided platform for sequence-specific control of gene  
15 expression. *Cell*. 152:1173-1183.
- 16 Ren, B., and N. Gupta. 2017. Taming Parasites by Tailoring Them. *Front Cell Infect Microbiol*.  
17 7:292.
- 18 Rivero, M.R., L. Kulakova, and M.C. Touz. 2010. Long double-stranded RNA produces specific  
19 gene downregulation in *Giardia lamblia*. *J Parasitol*. 96:815-819.

- 1 Savioli, L., H. Smith, and A. Thompson. 2006. *Giardia* and *Cryptosporidium* join the 'Neglected  
2 Diseases Initiative'. *Trends Parasitol.* 22:203-208.
- 3 Schindelin, J., I. Arganda-Carreras, E. Frise, V. Kaynig, M. Longair, T. Pietzsch, S. Preibisch, C.  
4 Rueden, S. Saalfeld, B. Schmid, J.Y. Tinevez, D.J. White, V. Hartenstein, K. Eliceiri, P.  
5 Tomancak, and A. Cardona. 2012. Fiji: an open-source platform for biological-image  
6 analysis. *Nature methods.* 9:676-682.
- 7 Sloboda, R.D. 2005. Intraflagellar transport and the flagellar tip complex. *J Cell Biochem.* 94:266-  
8 272.
- 9 Tao, W., L. Lv, and G.Q. Chen. 2017. Engineering *Halomonas* species TD01 for enhanced  
10 polyhydroxyalkanoates synthesis via CRISPRi. *Microb Cell Fact.* 16:48.
- 11 Upcroft, J., N. Samarawickrema, D. Brown, and P. Upcroft. 1996. Mechanisms of metronidazole  
12 resistance in *Giardia* and *Entamoeba*. *Abstracts of the Interscience Conference on*  
13 *Antimicrobial Agents and Chemotherapy.* 36:47.
- 14 Upcroft, P., and J.A. Upcroft. 2001. Drug targets and mechanisms of resistance in the anaerobic  
15 protozoa. *Clinical microbiology reviews.* 14:150-164.
- 16 Woessner, D.J., and S.C. Dawson. 2012. The *Giardia* median body protein is a ventral disc  
17 protein that is critical for maintaining a domed disc conformation during attachment.  
18 *Eukaryot Cell.* 11:292-301.



- 1 Zhang, B., Z.Q. Liu, C. Liu, and Y.G. Zheng. 2016. Application of CRISPRi in *Corynebacterium*
- 2 *glutamicum* for shikimic acid production. *Biotechnol Lett.* 38:2153-2161.
- 3 Zuberi, A., L. Misba, and A.U. Khan. 2017. CRISPR Interference (CRISPRi) Inhibition of luxS Gene
- 4 Expression in *E. coli*: An Approach to Inhibit Biofilm. *Front Cell Infect Microbiol.* 7:214.
- 5

Figure 1. A Giardia-specific nuclear localization signal (NLS) is necessary and sufficient to localize Cas9 and dCas9 to both nuclei.

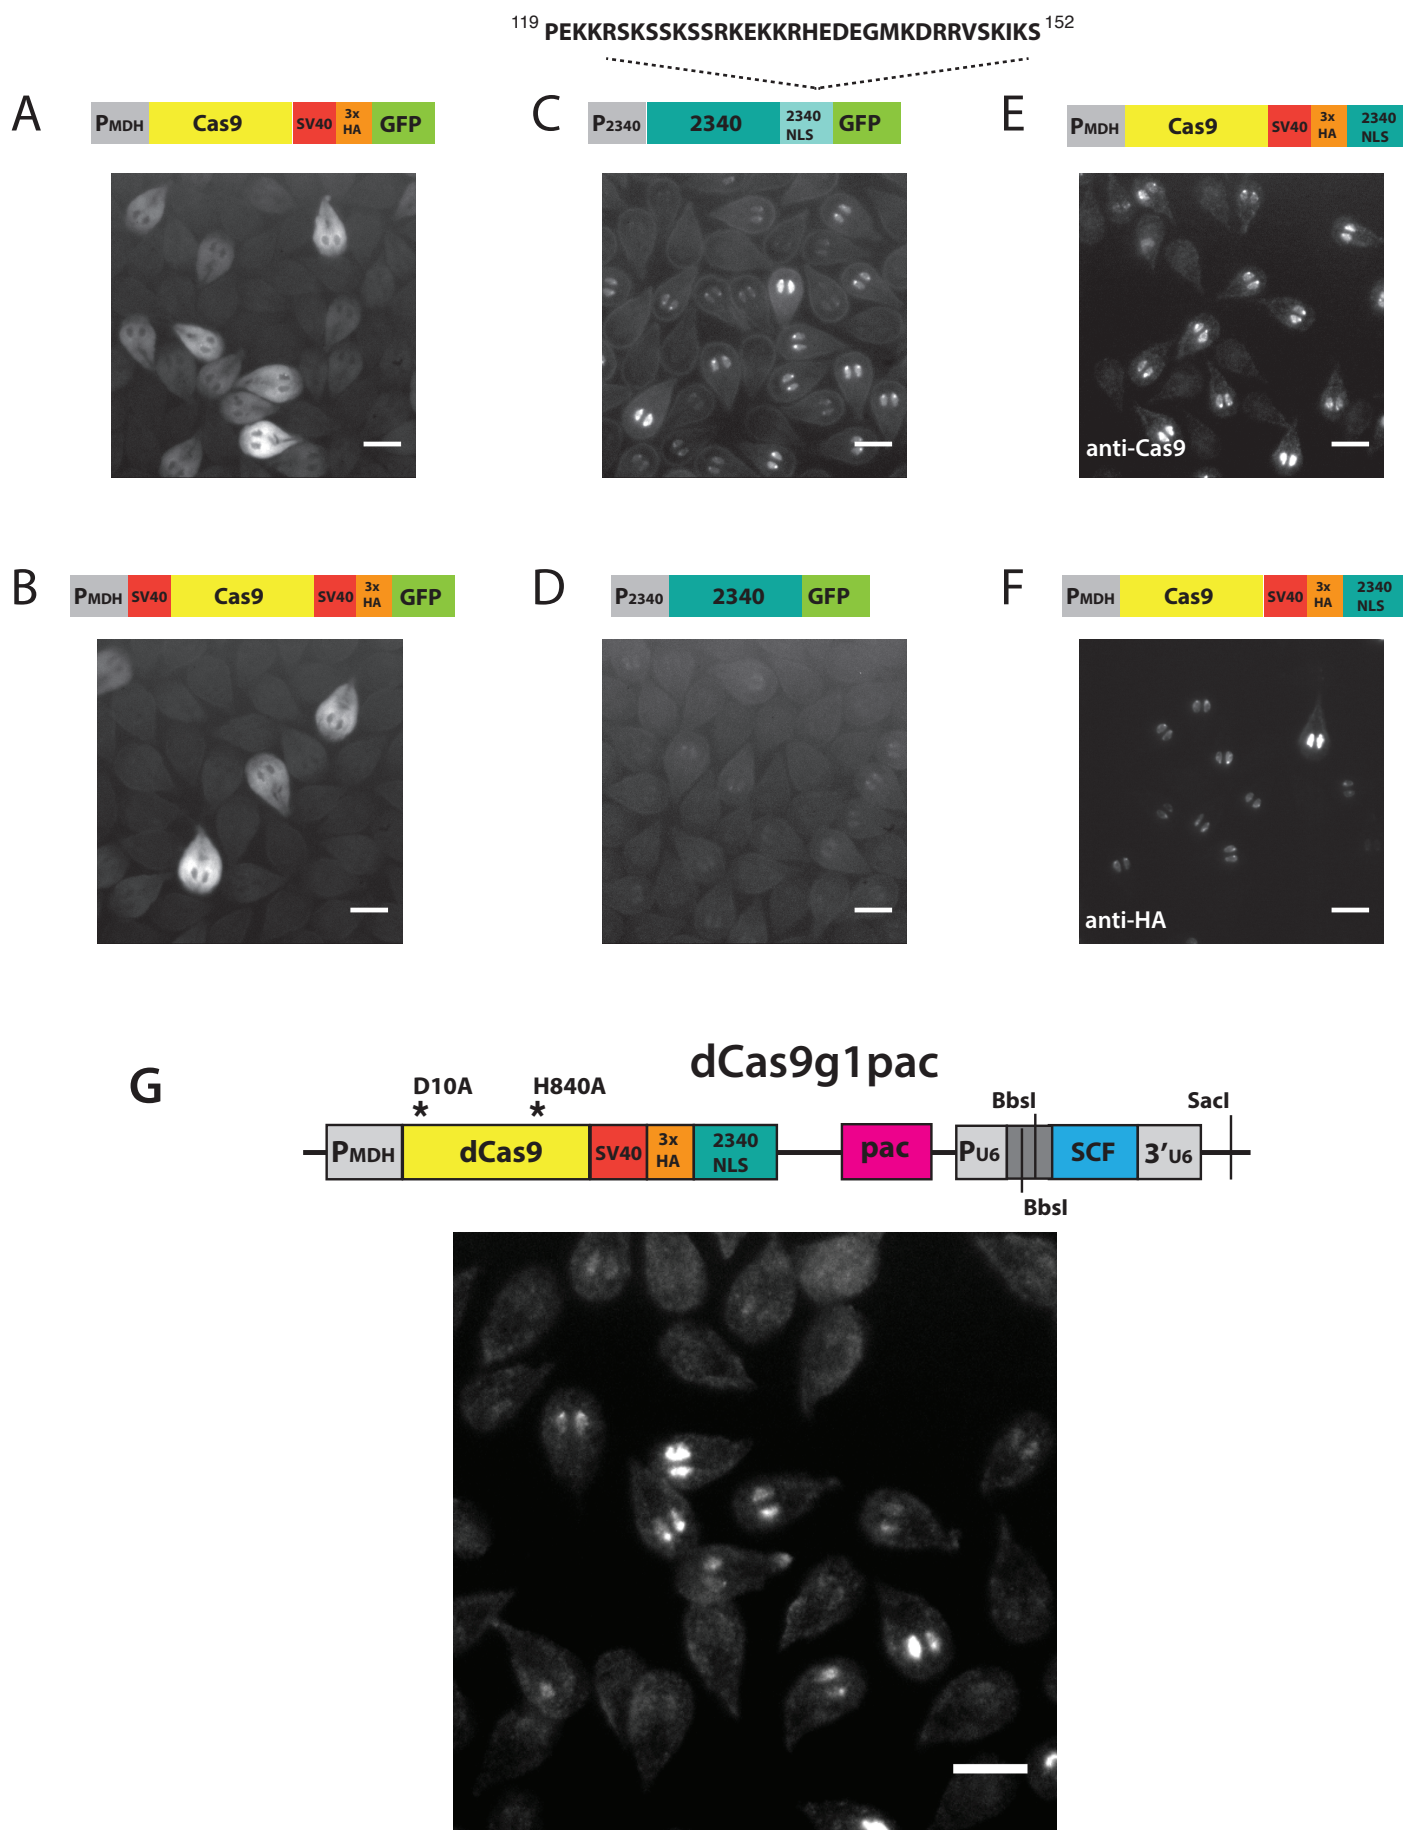

Figure 2. CRISPRi-mediated knockdown of exogenously expressed NanoLuc in Giardia.

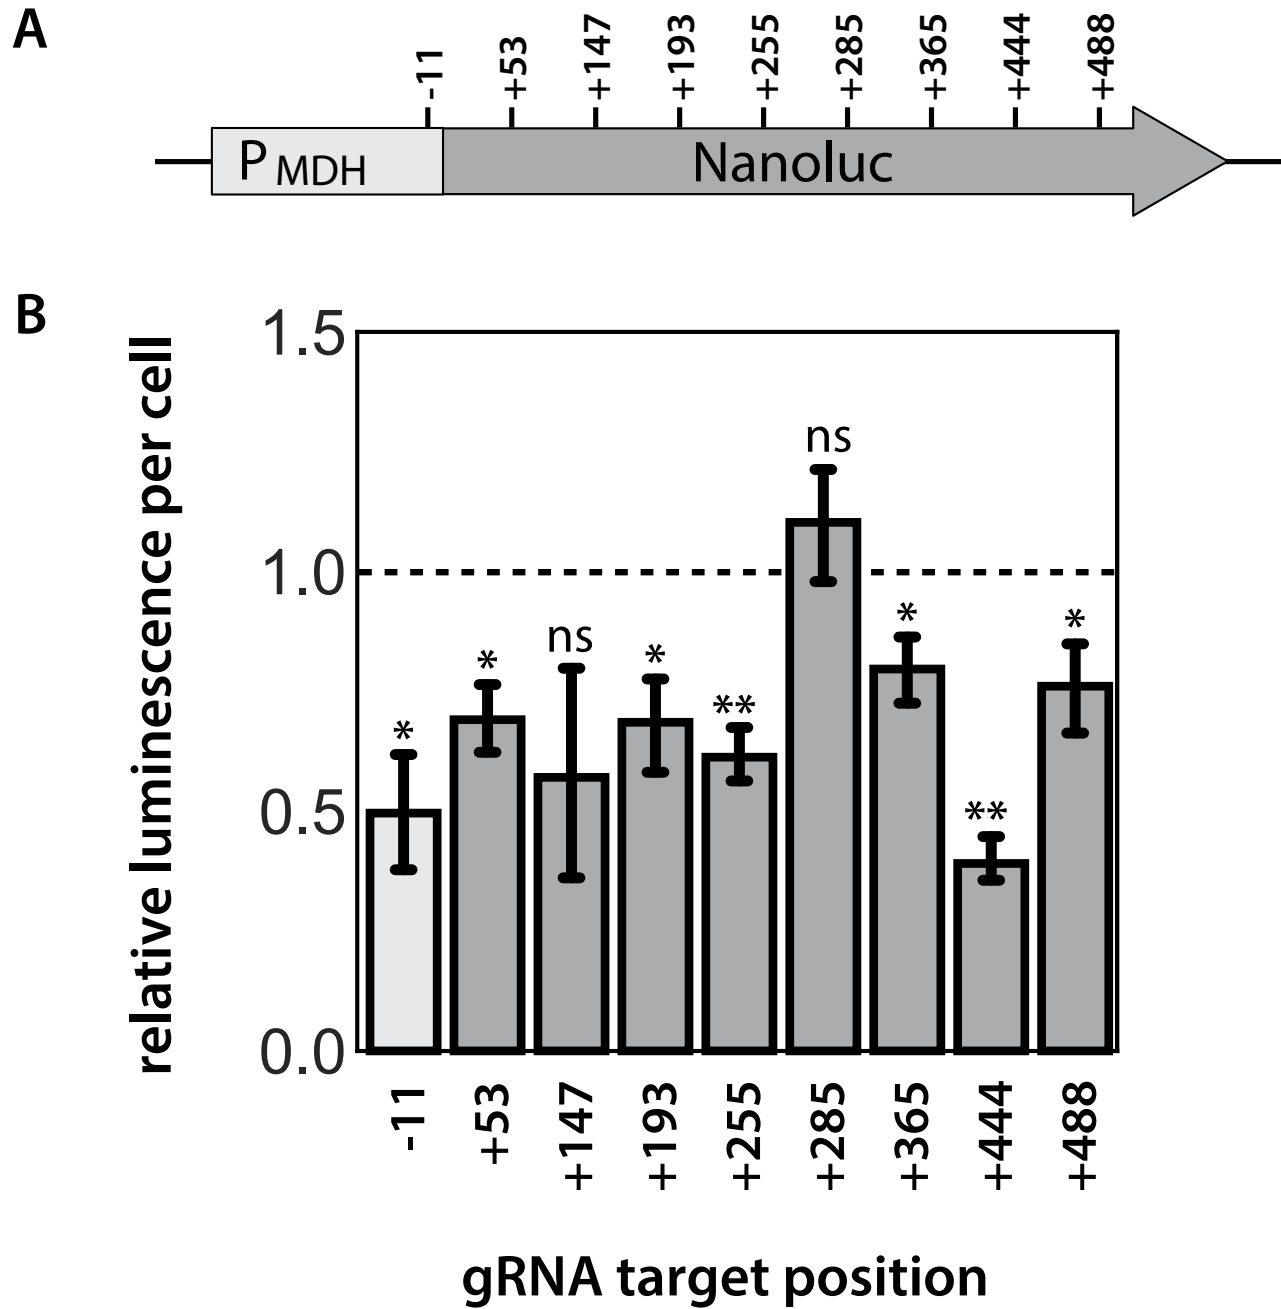

Figure 3. CRISPRi mediated knockdowns of kinesin-13 or kinesin-2a cause significant alterations in flagellar length

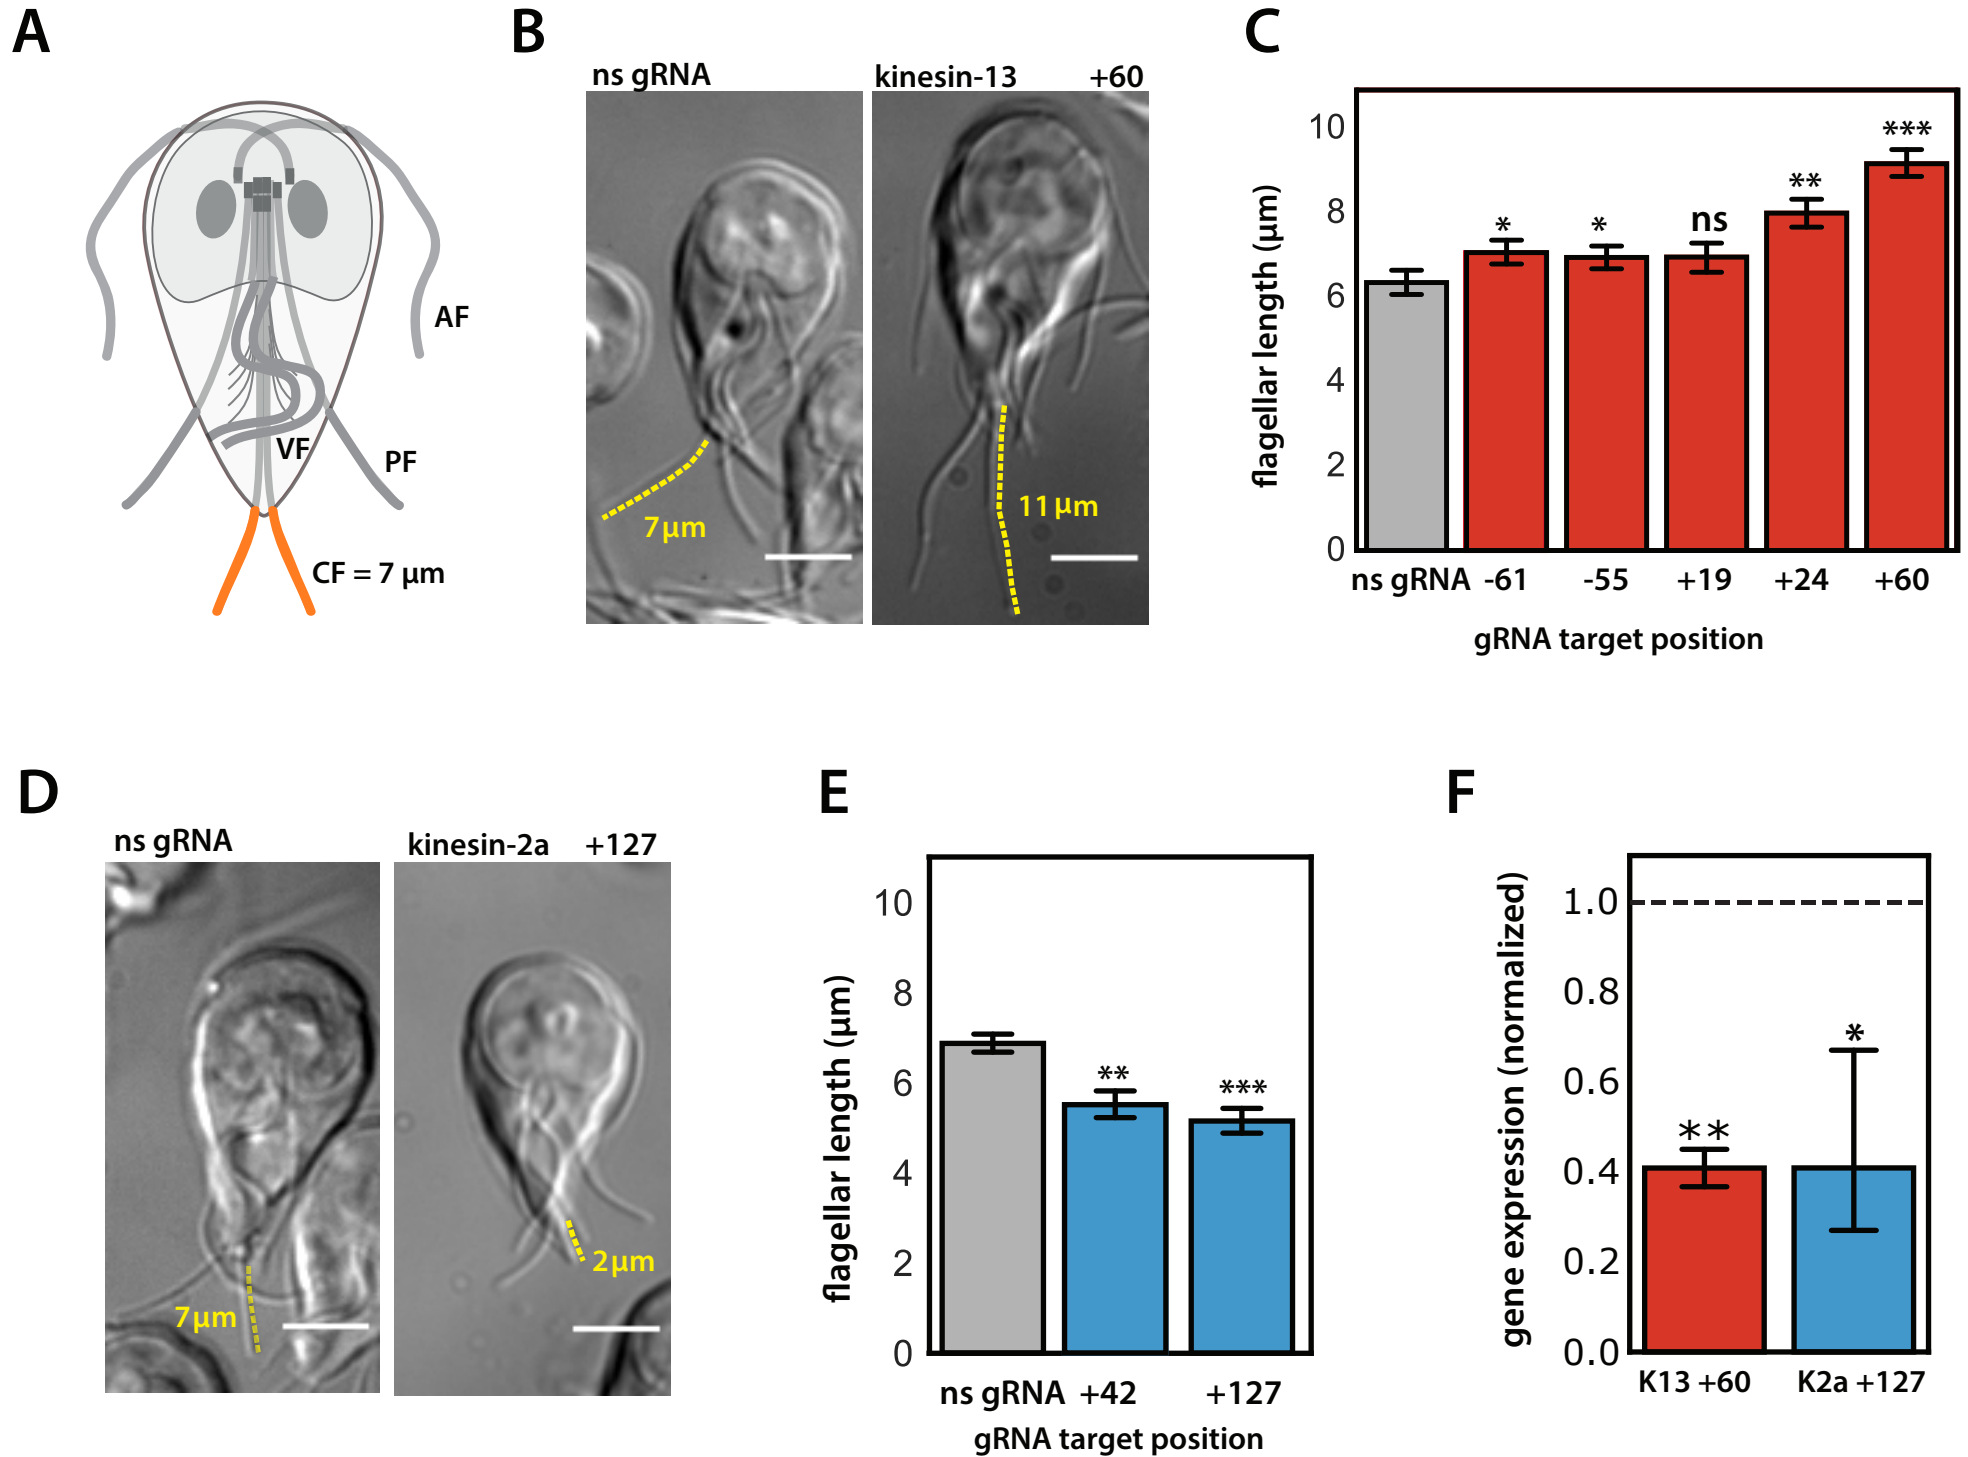

Figure 4. CRISPRi knockdown of the ventral disc protein MBP causes severe structural defects

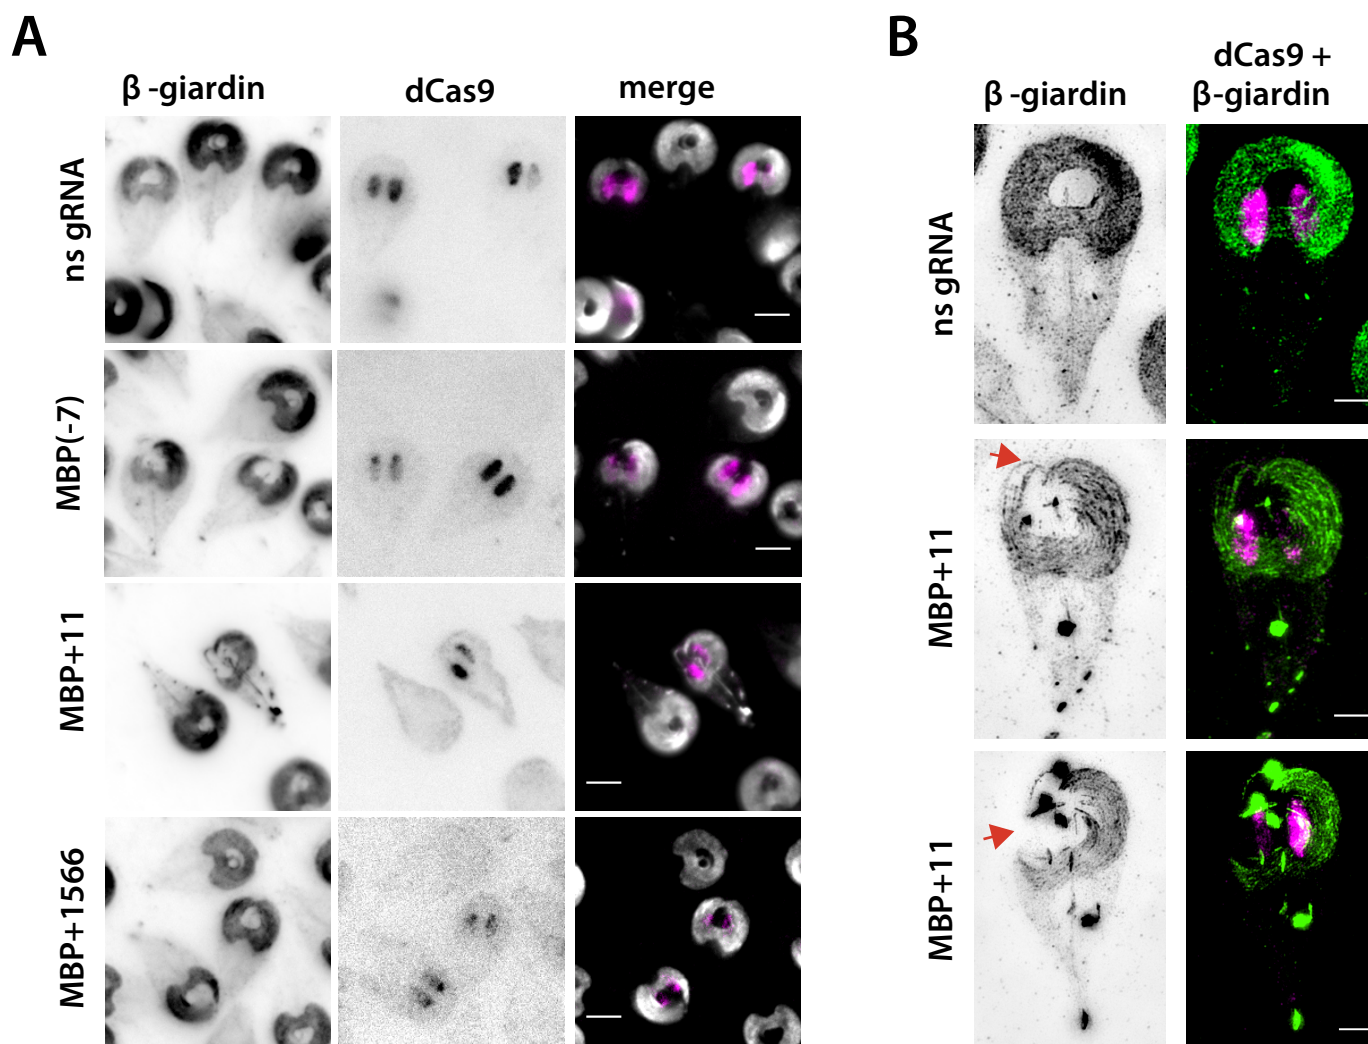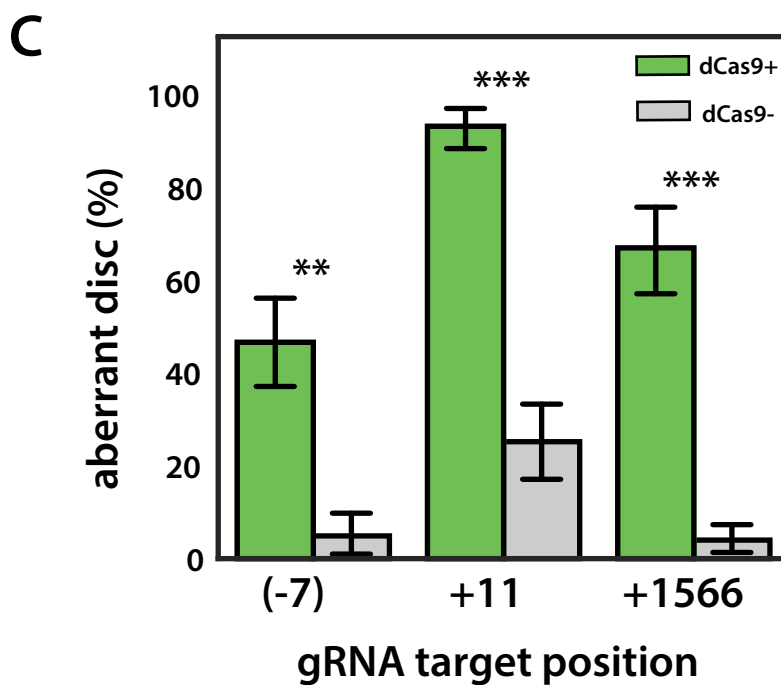

Figure 5. Aberrant disc phenotypes in the CRISPRi MBP+11 knockdown strain are highly penetrant and stable

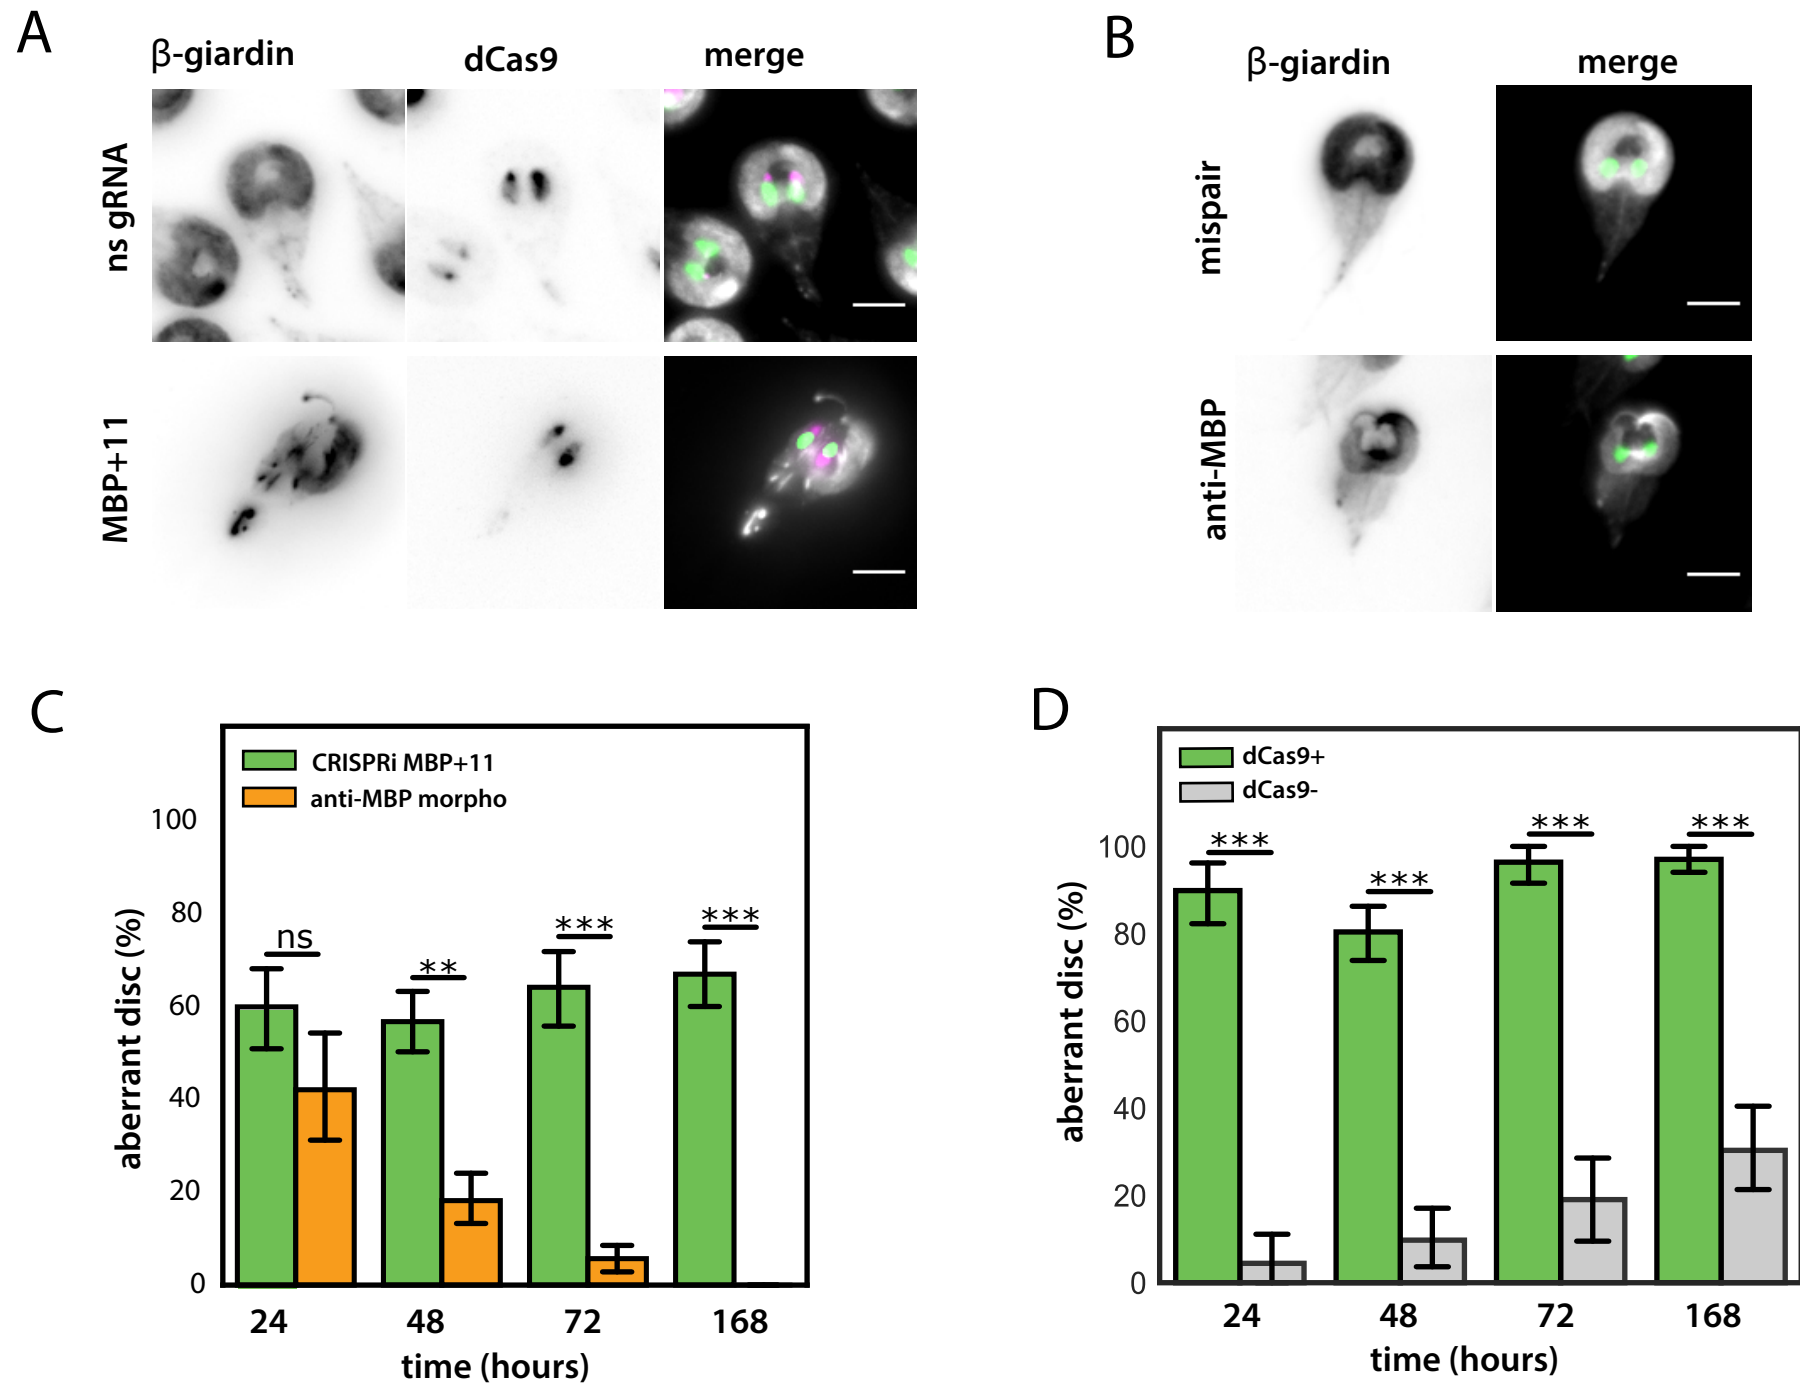

Figure 6. Simultaneous knockdown of kinesin-13 and MBP using two gRNAs to target both genes

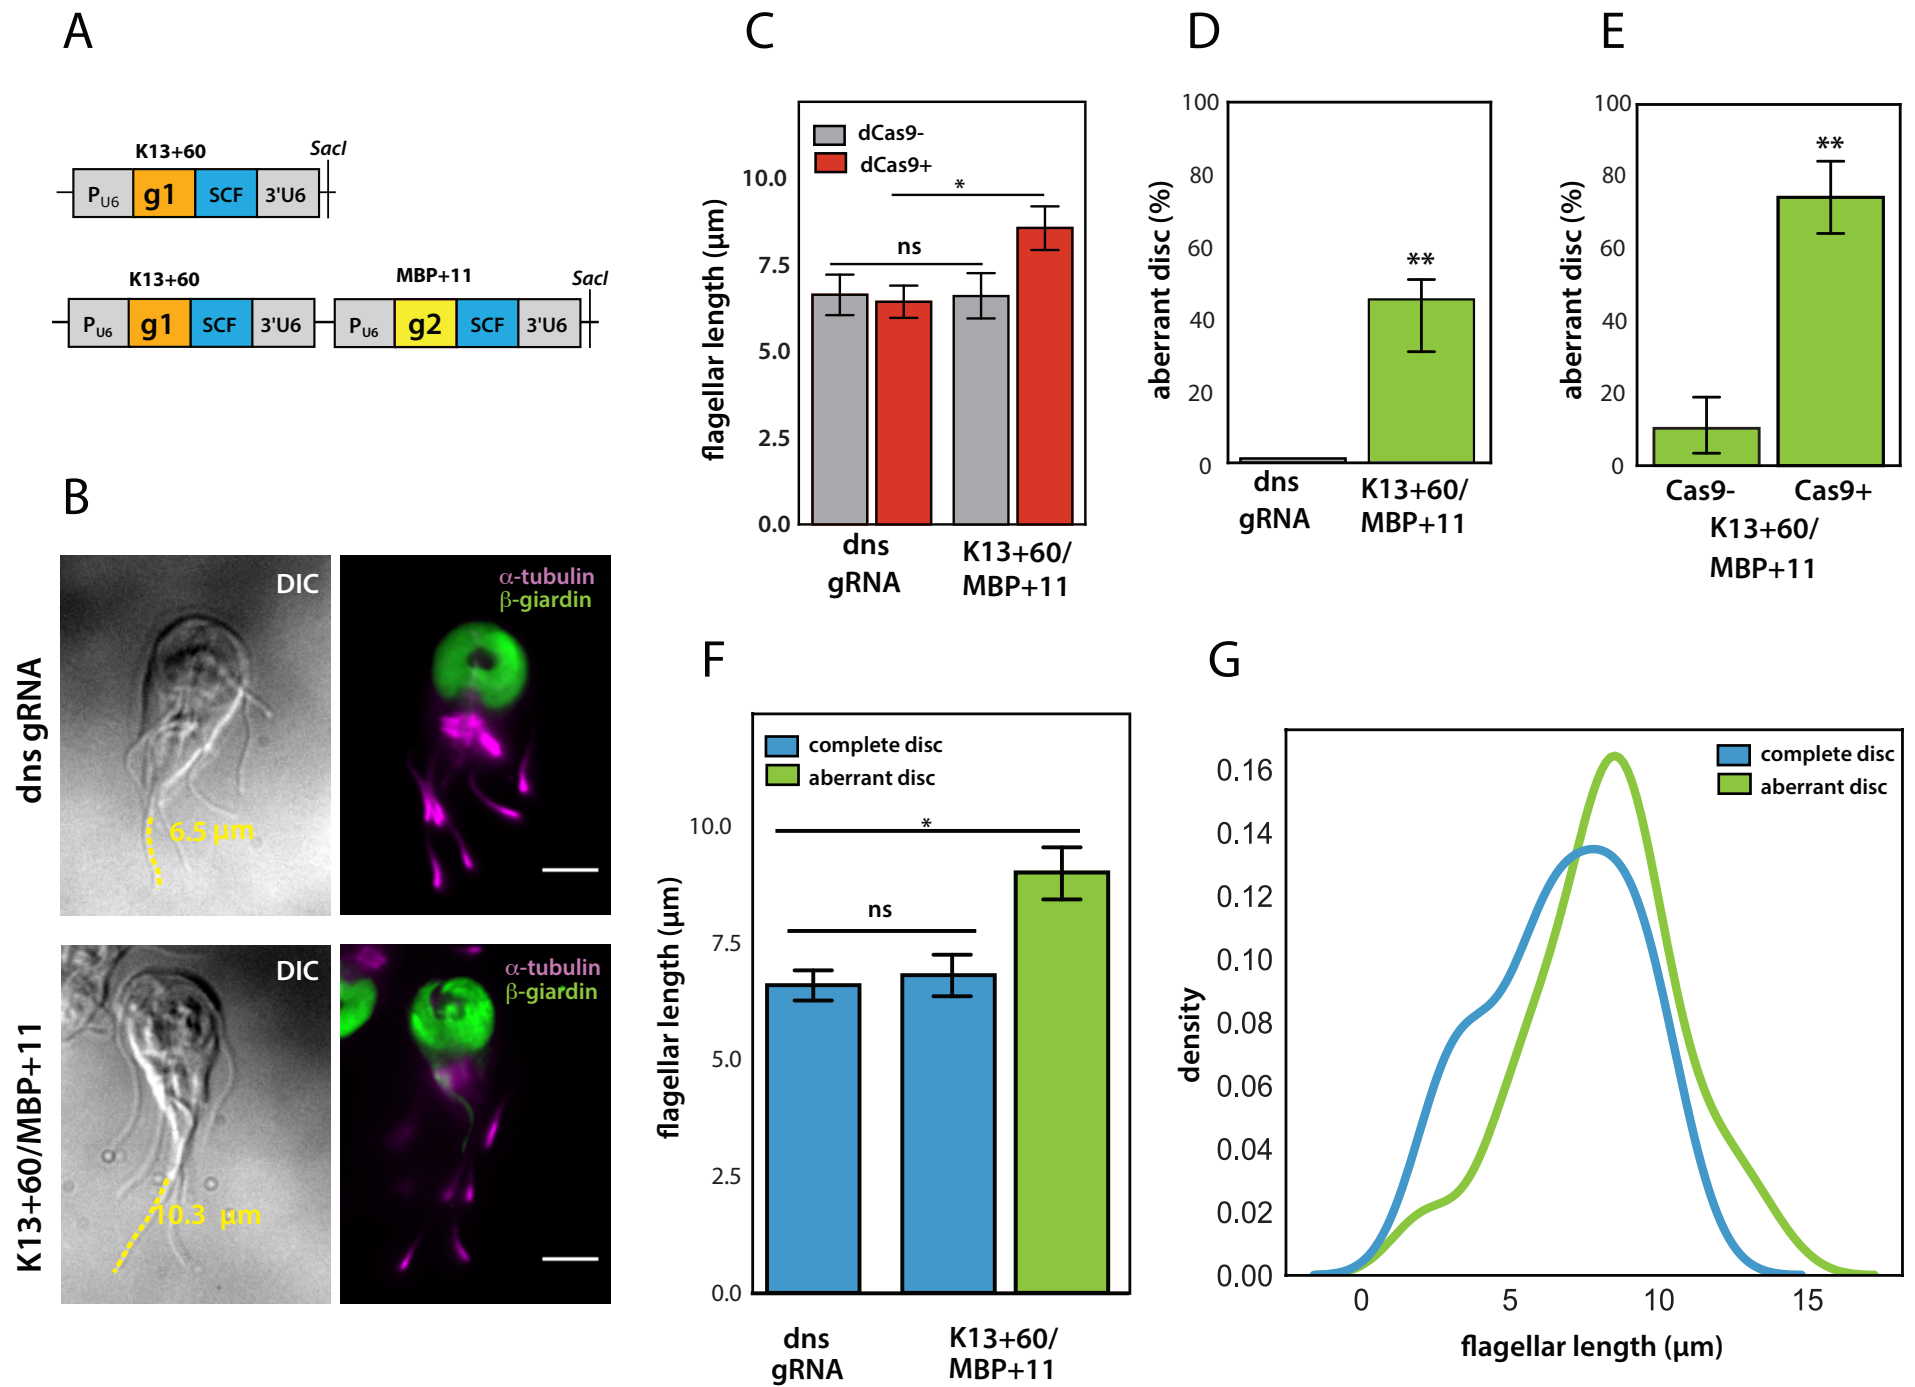

Source: https://www.biorxiv.org/content/10.1101/358598v2.full.pdf
